# Supplementary material for: Integrated Transcriptome and Binding Sites Analysis Implicates E2F in the Regulation of Self-Renewal in Human Pluripotent Stem Cells
Source: PubMed Central journal article supplement (PMC3208628; doi:10.1371/journal.pone.0027231), 2011-11-04
Supplement: pone.0027231.s010.pdf [file pone.0027231.s010.pdf]

# Supporting Data S1:

1. FDR analysis, Storey and Tibshirani, 2003 (DE metric)

LEGEND:

DE- differential expression

bp- biological process

pw- pathway

mf- molecular function

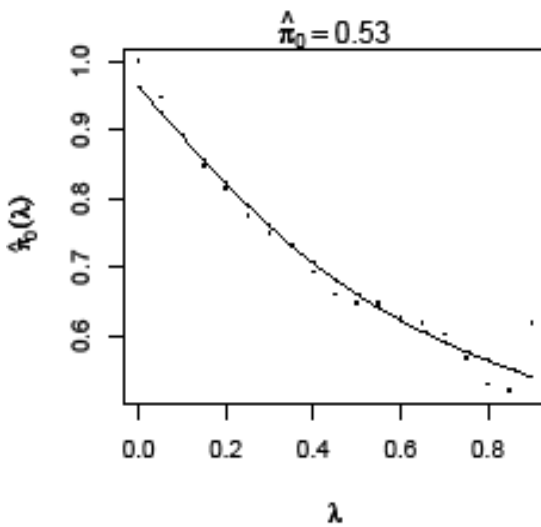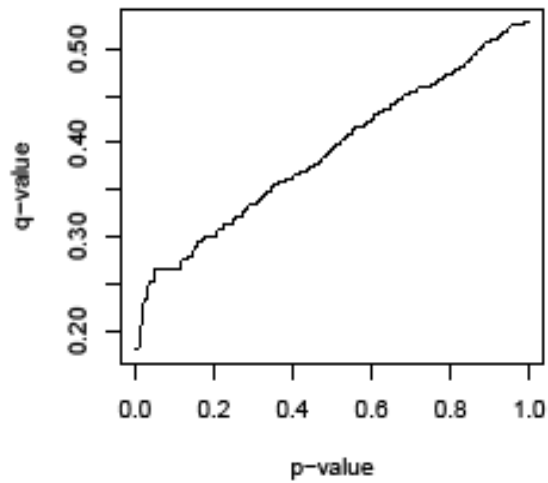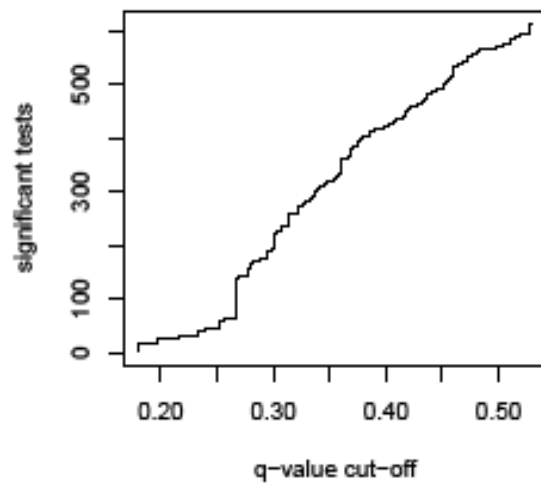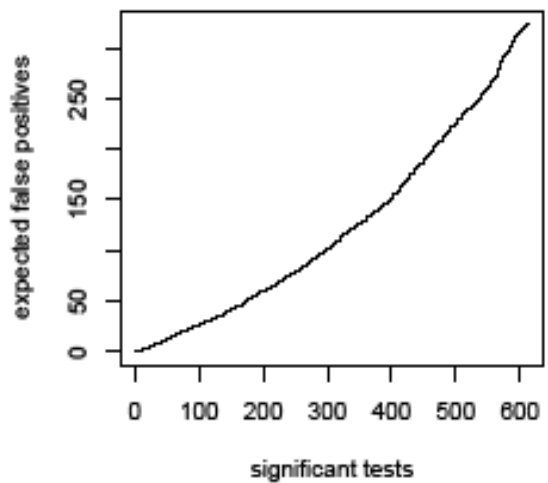

## 2. Target-cohort analysis P-values

### COLUMN LEGEND:

column 1- gene group

column 2- P-value

column 3- gene group type

column 4- q-value

### 2.1 Differential expression metric

| col 1                                    | col 2  | col 3 | col 4     |
|------------------------------------------|--------|-------|-----------|
| Vitamin metabolism                       | 0.0015 | bp    | 0.1802574 |
| Cell structure                           | 0.0018 | bp    | 0.1802574 |
| Cell adhesion                            | 0.0022 | bp    | 0.1802574 |
| Transport                                | 0.003  | bp    | 0.1802574 |
| G-protein mediated signaling             | 0.0039 | bp    | 0.1802574 |
| Neurogenesis                             | 0.0046 | bp    | 0.1802574 |
| Wnt signaling pathway                    | 0.0059 | pw    | 0.1802574 |
| Cell adhesion-mediated signaling         | 0.0059 | bp    | 0.1802574 |
| Hydroxylase                              | 0.0062 | mf    | 0.1802574 |
| Amino acid transporter                   | 0.0068 | mf    | 0.1802574 |
| Lysosome transport                       | 0.0076 | bp    | 0.1802574 |
| Protease inhibitor                       | 0.0077 | mf    | 0.1802574 |
| G-protein coupled receptor               | 0.0082 | mf    | 0.1802574 |
| Electron transport                       | 0.0083 | bp    | 0.1802574 |
| Steroid metabolism                       | 0.0085 | bp    | 0.1802574 |
| Oogenesis                                | 0.009  | bp    | 0.1802574 |
| Other lyase                              | 0.0094 | mf    | 0.1802574 |
| Oxygenase                                | 0.0131 | mf    | 0.1976165 |
| Muscle contraction                       | 0.0131 | bp    | 0.1976165 |
| Calcium mediated signaling               | 0.0134 | bp    | 0.1976165 |
| Amino acid biosynthesis                  | 0.0138 | bp    | 0.1976165 |
| Phosphatase modulator                    | 0.0141 | mf    | 0.1976165 |
| Actin and actin related protein          | 0.0142 | mf    | 0.1976165 |
| Zinc finger transcription factor         | 0.0152 | mf    | 0.1976165 |
| Neuronal activities                      | 0.0152 | bp    | 0.1976165 |
| Other protein targeting and localization | 0.0174 | bp    | 0.215895  |
| Embryogenesis                            | 0.0181 | bp    | 0.215895  |
| Extracellular matrix glycoprotein        | 0.0186 | mf    | 0.215895  |
| Other immune and defense                 | 0.0231 | bp    | 0.2333333 |
| Lipid and fatty acid binding             | 0.024  | bp    | 0.2333333 |
| Extracellular matrix structural protein  | 0.0245 | mf    | 0.2333333 |
| Peptide hormone                          | 0.0245 | mf    | 0.2333333 |
| Tight junction                           | 0.0251 | mf    | 0.2333333 |
| FGF signaling pathway                    | 0.0264 | pw    | 0.2333333 |
| Amino acid transport                     | 0.0265 | bp    | 0.2333333 |
| Other carbon metabolism                  | 0.0271 | bp    | 0.2333333 |
| Regulation of phosphate metabolism       | 0.0275 | bp    | 0.2333333 |
| Myelin protein                           | 0.0276 | mf    | 0.2333333 |
| B cell activation                        | 0.028  | pw    | 0.2333333 |
| Interferon receptor                      | 0.0306 | mf    | 0.2393182 |
| EGF receptor signaling pathway           | 0.0307 | pw    | 0.2393182 |
| Angiogenesis                             | 0.0314 | pw    | 0.2393182 |

|                                                                   |           |           |
|-------------------------------------------------------------------|-----------|-----------|
| HMG box transcription factor                                      | 0.0317 mf | 0.2393182 |
| T cell activation                                                 | 0.0324 pw | 0.2393182 |
| JNK cascade                                                       | 0.0355 bp | 0.2524167 |
| mRNA processing factor                                            | 0.0358 mf | 0.2524167 |
| DNA topoisomerase                                                 | 0.037 mf  | 0.2524167 |
| Oxytocin receptor mediated signaling pathway                      | 0.038 pw  | 0.2524167 |
| Oxidative stress response                                         | 0.04 pw   | 0.2524167 |
| p38 MAPK pathway                                                  | 0.0407 pw | 0.2524167 |
| Steroid hormone-mediated signaling                                | 0.0422 bp | 0.2524167 |
| Lipid and fatty acid transport                                    | 0.043 bp  | 0.2524167 |
| Cell motility                                                     | 0.044 bp  | 0.2524167 |
| Tubulin                                                           | 0.0441 mf | 0.2524167 |
| Vitamin_cofactor transport                                        | 0.0441 bp | 0.2524167 |
| De novo pyrimidine ribonucleotides biosynthesis                   | 0.0443 pw | 0.2524167 |
| Chromatin packaging and remodeling                                | 0.0443 bp | 0.2524167 |
| Inflammation mediated by chemokine and cytokine signaling pathway | 0.046 pw  | 0.2524167 |
| Vesicle coat protein                                              | 0.0464 mf | 0.2524167 |
| Pyruvate metabolism                                               | 0.0466 pw | 0.2524167 |
| Other receptor                                                    | 0.0492 mf | 0.2621311 |
| Basic helix-loop-helix transcription factor                       | 0.0531 mf | 0.2662174 |
| Cytokinesis                                                       | 0.0536 bp | 0.2662174 |
| Hedgehog signaling pathway                                        | 0.056 pw  | 0.2662174 |
| Dehydratase                                                       | 0.0572 mf | 0.2662174 |
| Other transfer_carrier protein                                    | 0.058 mf  | 0.2662174 |
| Huntington disease                                                | 0.06 pw   | 0.2662174 |
| Exocytosis                                                        | 0.0607 bp | 0.2662174 |
| Cadherin signaling pathway                                        | 0.0617 pw | 0.2662174 |
| Aminobutyrate degradation                                         | 0.0618 pw | 0.2662174 |
| Carnitine and CoA metabolism                                      | 0.0634 pw | 0.2662174 |
| Tricarboxylic acid pathway                                        | 0.0636 bp | 0.2662174 |
| Guanylate cyclase                                                 | 0.0638 mf | 0.2662174 |
| Serine protease inhibitor                                         | 0.0644 mf | 0.2662174 |
| Actin binding motor protein                                       | 0.0645 mf | 0.2662174 |
| Carnitine metabolism                                              | 0.065 pw  | 0.2662174 |
| VEGF signaling pathway                                            | 0.0657 pw | 0.2662174 |
| Other transferase                                                 | 0.0659 mf | 0.2662174 |
| Methylcitrate cycle                                               | 0.0681 pw | 0.2662174 |
| Peroxidase                                                        | 0.0689 mf | 0.2662174 |
| Ectoderm development                                              | 0.069 bp  | 0.2662174 |
| Actin binding cytoskeletal protein                                | 0.0697 mf | 0.2662174 |
| Receptor                                                          | 0.0702 mf | 0.2662174 |
| Extracellular matrix                                              | 0.0733 mf | 0.2662174 |
| Apoptotic processes                                               | 0.0771 bp | 0.2662174 |
| MAPKKK cascade                                                    | 0.0772 bp | 0.2662174 |
| DNA helicase                                                      | 0.0773 mf | 0.2662174 |
| Small GTPase                                                      | 0.0783 mf | 0.2662174 |
| Fatty acid metabolism                                             | 0.0785 bp | 0.2662174 |
| Metabotropic glutamate receptor group I pathway                   | 0.0786 pw | 0.2662174 |
| Storage protein                                                   | 0.0791 mf | 0.2662174 |
| Phosphatase inhibitor                                             | 0.0798 mf | 0.2662174 |
| Growth factor homeostasis                                         | 0.0798 bp | 0.2662174 |
| Cadherin                                                          | 0.0806 mf | 0.2662174 |
| De novo pyrimidine deoxyribonucleotide biosynthesis               | 0.0809 pw | 0.2662174 |

|                                                             |           |           |
|-------------------------------------------------------------|-----------|-----------|
| General vesicle transport                                   | 0.0826 bp | 0.2662174 |
| Histamine H1 receptor mediated signaling pathway            | 0.0828 pw | 0.2662174 |
| Transcription factor                                        | 0.0834 mf | 0.2662174 |
| ATP synthesis                                               | 0.0843 pw | 0.2662174 |
| Chaperonin                                                  | 0.0852 mf | 0.2662174 |
| Hypoxia response via HIF activation                         | 0.0855 pw | 0.2662174 |
| Acetate utilization                                         | 0.087 pw  | 0.2662174 |
| Vision                                                      | 0.0872 bp | 0.2662174 |
| Ascorbate degradation                                       | 0.0875 pw | 0.2662174 |
| Cysteine protease inhibitor                                 | 0.0879 mf | 0.2662174 |
| Phospholipase                                               | 0.0898 mf | 0.2662174 |
| Phosphate metabolism                                        | 0.0905 bp | 0.2662174 |
| Other miscellaneous function protein                        | 0.0909 mf | 0.2662174 |
| Alpha adrenergic receptor signaling pathway                 | 0.0919 pw | 0.2662174 |
| Cell adhesion molecule                                      | 0.0927 mf | 0.2662174 |
| Translation factor                                          | 0.0931 mf | 0.2662174 |
| Membrane traffic protein                                    | 0.0938 mf | 0.2662174 |
| DNA replication                                             | 0.094 pw  | 0.2662174 |
| Receptor protein tyrosine kinase signaling pathway          | 0.094 bp  | 0.2662174 |
| Primase                                                     | 0.0942 mf | 0.2662174 |
| Proteolysis                                                 | 0.0951 bp | 0.266444  |
| Transfer_carrier protein                                    | 0.0965 mf | 0.2667708 |
| FAS signaling pathway                                       | 0.0972 pw | 0.2667708 |
| Induction of apoptosis                                      | 0.0981 bp | 0.2667708 |
| Angiogenesis                                                | 0.0985 bp | 0.2667708 |
| PI3 kinase pathway                                          | 0.1007 pw | 0.2670652 |
| Methyltransferase                                           | 0.1019 mf | 0.2670652 |
| Other defense and immunity protein                          | 0.1028 mf | 0.2670652 |
| Skeletal development                                        | 0.1033 bp | 0.2670652 |
| Muscle development                                          | 0.1047 bp | 0.2670652 |
| Nitric oxide biosynthesis                                   | 0.1056 bp | 0.2670652 |
| Membrane-bound signaling molecule                           | 0.107 mf  | 0.2670652 |
| Oncogenesis                                                 | 0.108 bp  | 0.2670652 |
| mRNA splicing                                               | 0.1081 bp | 0.2670652 |
| Other blood circulation and gas exchange activity           | 0.1081 bp | 0.2670652 |
| Oxidative phosphorylation                                   | 0.1095 bp | 0.2670652 |
| Developmental processes                                     | 0.1099 bp | 0.2670652 |
| Parkinson disease                                           | 0.1111 pw | 0.2670652 |
| Amino acid catabolism                                       | 0.1114 bp | 0.2670652 |
| Alzheimer disease-presenilin pathway                        | 0.1118 pw | 0.2670652 |
| Phenylethylamine degradation                                | 0.1128 pw | 0.2670652 |
| Androgen_estrogene_progesterone biosynthesis                | 0.1129 pw | 0.2670652 |
| Cytokine_chemokine mediated immunity                        | 0.1134 bp | 0.2670652 |
| Hydrogen transporter                                        | 0.1148 mf | 0.2684173 |
| Tumor necrosis factor family member                         | 0.1157 mf | 0.2685893 |
| Muscarinic acetylcholine receptor 1 and 3 signaling pathway | 0.1176 pw | 0.2710638 |
| Calmodulin related protein                                  | 0.1206 mf | 0.2760211 |
| Damaged DNA-binding protein                                 | 0.124 mf  | 0.2777273 |
| Other carbohydrate metabolism                               | 0.1242 bp | 0.2777273 |
| GABA receptor                                               | 0.1243 mf | 0.2777273 |
| Nerve-nerve synaptic transmission                           | 0.1262 bp | 0.2777273 |
| Chromosome segregation                                      | 0.1265 bp | 0.2777273 |
| Apoptosis signaling pathway                                 | 0.1271 pw | 0.2777273 |

|                                                                                |           |           |
|--------------------------------------------------------------------------------|-----------|-----------|
| DNA replication                                                                | 0.1283 bp | 0.2777273 |
| Phagocytosis                                                                   | 0.1289 bp | 0.2777273 |
| Cholesterol metabolism                                                         | 0.1296 bp | 0.2777273 |
| mRNA end-processing and stability                                              | 0.1308 bp | 0.2777273 |
| Ras Pathway                                                                    | 0.1312 pw | 0.2777273 |
| Structural protein                                                             | 0.1316 mf | 0.2777273 |
| Select calcium binding protein                                                 | 0.1347 mf | 0.2793354 |
| Protein targeting                                                              | 0.1347 bp | 0.2793354 |
| Transmembrane receptor regulatory_adaptor protein                              | 0.1355 mf | 0.2793354 |
| p53 pathway feedback loops 2                                                   | 0.1358 pw | 0.2793354 |
| Endocytosis                                                                    | 0.1375 bp | 0.2793825 |
| Axon guidance mediated by semaphorins                                          | 0.1381 pw | 0.2793825 |
| Purine metabolism                                                              | 0.1398 bp | 0.2793825 |
| Protein glycosylation                                                          | 0.1411 bp | 0.2793825 |
| Glycosyltransferase                                                            | 0.1418 mf | 0.2793825 |
| Receptor protein serine_threonine kinase signaling pathway                     | 0.142 bp  | 0.2793825 |
| DNA polymerase processivity factor                                             | 0.1422 mf | 0.2793825 |
| Cytoskeletal regulation by Rho GTPase                                          | 0.1427 pw | 0.2793825 |
| Chemokine                                                                      | 0.1436 mf | 0.2794611 |
| DNA glycosylase                                                                | 0.1467 mf | 0.2823077 |
| De novo purine biosynthesis                                                    | 0.1468 pw | 0.2823077 |
| Stress response                                                                | 0.1486 bp | 0.282617  |
| Lipid metabolism                                                               | 0.1487 bp | 0.282617  |
| Thyrotropin-releasing hormone receptor signaling pathway                       | 0.1521 pw | 0.2870833 |
| Anion transport                                                                | 0.153 bp  | 0.2870833 |
| Signal transduction                                                            | 0.1537 bp | 0.2870833 |
| Microtubule binding motor protein                                              | 0.1565 mf | 0.2906429 |
| Annexin                                                                        | 0.1605 mf | 0.295107  |
| Cell surface receptor mediated signal transduction                             | 0.1612 bp | 0.295107  |
| 5HT2 type receptor mediated signaling pathway                                  | 0.162 pw  | 0.295107  |
| Other intracellular protein traffic                                            | 0.1636 bp | 0.295107  |
| 5-Hydroxytryptamine degradation                                                | 0.1664 pw | 0.295107  |
| Lyase                                                                          | 0.1668 mf | 0.295107  |
| Pyrimidine Metabolism                                                          | 0.1673 pw | 0.295107  |
| Extracellular matrix protein-mediated signaling                                | 0.1674 bp | 0.295107  |
| Cell junction protein                                                          | 0.1675 mf | 0.295107  |
| Protein ADP-ribosylation                                                       | 0.1686 bp | 0.295107  |
| Endothelin signaling pathway                                                   | 0.1694 pw | 0.295107  |
| Other cell adhesion molecule                                                   | 0.1698 mf | 0.295107  |
| Other sulfur metabolism                                                        | 0.171 bp  | 0.2956117 |
| Proline biosynthesis                                                           | 0.1738 pw | 0.2978026 |
| Insulin_IGF pathway-mitogen activated protein kinase kinase_MAP kinase cascade | 0.1741 pw | 0.2978026 |
| Asymmetric protein localization                                                | 0.1773 bp | 0.299201  |
| N-acetylglucosamine metabolism                                                 | 0.1781 pw | 0.299201  |
| Receptor mediated endocytosis                                                  | 0.1785 bp | 0.299201  |
| Signaling molecule                                                             | 0.1786 mf | 0.299201  |
| Coenzyme A biosynthesis                                                        | 0.1815 pw | 0.3012444 |
| p53 pathway                                                                    | 0.1873 pw | 0.3012444 |
| CREB transcription factor                                                      | 0.1891 mf | 0.3012444 |
| Natural killer cell mediated immunity                                          | 0.1896 bp | 0.3012444 |
| Antibacterial response protein                                                 | 0.1904 mf | 0.3012444 |
| Other actin family cytoskeletal protein                                        | 0.1904 mf | 0.3012444 |
| Single-stranded DNA-binding protein                                            | 0.1917 mf | 0.3012444 |

|                                                                          |           |           |
|--------------------------------------------------------------------------|-----------|-----------|
| Other homeostasis activities                                             | 0.1925 bp | 0.3012444 |
| Integrin signalling pathway                                              | 0.1929 pw | 0.3012444 |
| Other synthase_synthetase                                                | 0.1941 mf | 0.3012444 |
| Angiotensin II-stimulated signaling through G proteins and beta-arrestin | 0.1948 pw | 0.3012444 |
| Other pathways of electron transport                                     | 0.1966 bp | 0.3012444 |
| Pyrimidine metabolism                                                    | 0.1967 bp | 0.3012444 |
| Antioxidation and free radical removal                                   | 0.1969 bp | 0.3012444 |
| Extracellular matrix linker protein                                      | 0.1977 mf | 0.3012444 |
| Neurotrophic factor                                                      | 0.198 mf  | 0.3012444 |
| Other cell cycle process                                                 | 0.1994 bp | 0.3012444 |
| Other select calcium binding proteins                                    | 0.1998 mf | 0.3012444 |
| Plasminogen activating cascade                                           | 0.2 pw    | 0.3012444 |
| Ligand-mediated signaling                                                | 0.2005 bp | 0.3012444 |
| Transferase                                                              | 0.2014 mf | 0.3012444 |
| Xanthine and guanine salvage pathway                                     | 0.2018 pw | 0.3012444 |
| Oncogene                                                                 | 0.2035 bp | 0.3012444 |
| Axon guidance mediated by Slit_Robo                                      | 0.2037 pw | 0.3012444 |
| Ion channel                                                              | 0.2042 mf | 0.3012444 |
| Nuclear transport                                                        | 0.2048 bp | 0.3012444 |
| DNA-directed DNA polymerase                                              | 0.205 mf  | 0.3012444 |
| Calcium ion homeostasis                                                  | 0.2058 bp | 0.3012444 |
| mRNA transcription elongation                                            | 0.2067 bp | 0.3012444 |
| Other membrane traffic protein                                           | 0.2121 mf | 0.3075    |
| Large G-protein                                                          | 0.2144 mf | 0.3075    |
| Intracellular protein traffic                                            | 0.215 bp  | 0.3075    |
| Fertilization                                                            | 0.2171 bp | 0.3075    |
| Extracellular transport and import                                       | 0.2179 bp | 0.3075    |
| Endoderm development                                                     | 0.218 bp  | 0.3075    |
| Alzheimer disease-amyloid secretase pathway                              | 0.2198 pw | 0.3075    |
| Defense_immunity protein                                                 | 0.2207 mf | 0.3075    |
| Macrophage-mediated immunity                                             | 0.2207 bp | 0.3075    |
| Glycosidase                                                              | 0.2208 mf | 0.3075    |
| Other oncogenesis                                                        | 0.2214 bp | 0.3075    |
| Chromatin_chromatin-binding protein                                      | 0.2226 mf | 0.3078511 |
| Protein targeting and localization                                       | 0.2253 bp | 0.3102648 |
| Axon guidance mediated by netrin                                         | 0.228 pw  | 0.3126582 |
| Hydrolase                                                                | 0.2299 mf | 0.31278   |
| Other signaling molecule                                                 | 0.2316 mf | 0.31278   |
| Tumor necrosis factor receptor                                           | 0.2334 mf | 0.31278   |
| Other apoptosis                                                          | 0.2345 bp | 0.31278   |
| P53 pathway feedback loops 1                                             | 0.2356 pw | 0.31278   |
| Phosphate transport                                                      | 0.2373 bp | 0.31278   |
| Serine protease                                                          | 0.2377 mf | 0.31278   |
| Synthase and synthetase                                                  | 0.2377 mf | 0.31278   |
| G-protein modulator                                                      | 0.2382 mf | 0.31278   |
| Other amino acid metabolism                                              | 0.2395 bp | 0.31278   |
| Neuromuscular synaptic transmission                                      | 0.2397 bp | 0.31278   |
| DNA degradation                                                          | 0.24 bp   | 0.31278   |
| B-cell- and antibody-mediated immunity                                   | 0.2406 bp | 0.31278   |
| Glycolysis                                                               | 0.2416 pw | 0.3128287 |
| Other receptor mediated signaling pathway                                | 0.2438 bp | 0.3143359 |
| PDGF signaling pathway                                                   | 0.2454 pw | 0.3143359 |
| Exodeoxyribonuclease                                                     | 0.2468 mf | 0.3143359 |

|                                                       |           |           |
|-------------------------------------------------------|-----------|-----------|
| Ion transport                                         | 0.2473 bp | 0.3143359 |
| Intracellular signaling cascade                       | 0.2476 bp | 0.3143359 |
| Non-motor actin binding protein                       | 0.2516 mf | 0.3181712 |
| T-cell mediated immunity                              | 0.2529 bp | 0.3185756 |
| mRNA splicing                                         | 0.2569 pw | 0.3211765 |
| Kinase inhibitor                                      | 0.2612 mf | 0.3211765 |
| Inhibition of apoptosis                               | 0.2625 bp | 0.3211765 |
| mRNA transcription termination                        | 0.2626 bp | 0.3211765 |
| Cation transporter                                    | 0.2627 mf | 0.3211765 |
| Nucleic acid binding                                  | 0.2627 mf | 0.3211765 |
| Nicotinic acetylcholine receptor signaling pathway    | 0.264 pw  | 0.3211765 |
| Heart development                                     | 0.2645 bp | 0.3211765 |
| Aspartic protease                                     | 0.2649 mf | 0.3211765 |
| Tyrosine protein kinase receptor                      | 0.2653 mf | 0.3211765 |
| Constitutive exocytosis                               | 0.266 bp  | 0.3211765 |
| Aldolase                                              | 0.2678 mf | 0.3211765 |
| Endoribonuclease                                      | 0.268 mf  | 0.3211765 |
| Pre-mRNA processing                                   | 0.2688 bp | 0.3211765 |
| Regulation of vasoconstriction, dilation              | 0.2705 bp | 0.3220238 |
| Other isomerase                                       | 0.2731 mf | 0.3239325 |
| Lipase                                                | 0.2763 mf | 0.3265364 |
| Glycolysis                                            | 0.2779 bp | 0.3272373 |
| Other ligase                                          | 0.2822 mf | 0.3290337 |
| Kinase activator                                      | 0.2839 mf | 0.3290337 |
| Cell communication                                    | 0.2839 bp | 0.3290337 |
| Vitamin biosynthesis                                  | 0.285 bp  | 0.3290337 |
| Meiosis                                               | 0.2854 bp | 0.3290337 |
| Protein disulfide-isomerase reaction                  | 0.2855 bp | 0.3290337 |
| Immunoglobulin receptor family member                 | 0.2913 mf | 0.3335526 |
| General transcription by RNA polymerase I             | 0.2918 pw | 0.3335526 |
| Detoxification                                        | 0.2925 bp | 0.3335526 |
| Transcription regulation by bZIP transcription factor | 0.2945 pw | 0.3344931 |
| Regulation of carbohydrate metabolism                 | 0.2959 bp | 0.3344931 |
| Other oxidoreductase                                  | 0.2972 mf | 0.3344931 |
| Circadian clock system                                | 0.2975 pw | 0.3344931 |
| Other cell junction protein                           | 0.2986 mf | 0.3344931 |
| Ribosomal protein                                     | 0.2995 mf | 0.3344931 |
| Protein phosphatase                                   | 0.3021 mf | 0.3358333 |
| Protein metabolism and modification                   | 0.3038 bp | 0.3358333 |
| Mutase                                                | 0.3056 mf | 0.3358333 |
| Nucleoside, nucleotide and nucleic acid transport     | 0.306 bp  | 0.3358333 |
| Cysteine protease                                     | 0.3069 mf | 0.3358333 |
| Protein complex assembly                              | 0.3069 bp | 0.3358333 |
| Chemosensory perception                               | 0.3107 bp | 0.3380428 |
| Synthetase                                            | 0.3123 mf | 0.3380428 |
| Membrane traffic regulatory protein                   | 0.3141 mf | 0.3380428 |
| Ribonucleoprotein                                     | 0.3145 mf | 0.3380428 |
| Pentose-phosphate shunt                               | 0.3156 bp | 0.3380428 |
| Cytokine and chemokine mediated signaling pathway     | 0.3161 bp | 0.3380428 |
| Fatty acid beta-oxidation                             | 0.3162 bp | 0.3380428 |
| Other zinc finger transcription factor                | 0.3193 mf | 0.3402377 |
| DNA repair                                            | 0.3228 bp | 0.3415666 |
| Galactosidase                                         | 0.3233 mf | 0.3415666 |

|                                                                                   |           |           |
|-----------------------------------------------------------------------------------|-----------|-----------|
| Immunoglobulin                                                                    | 0.3237 mf | 0.3415666 |
| Hydratase                                                                         | 0.3278 mf | 0.3447735 |
| Other cytokine                                                                    | 0.3293 mf | 0.3450399 |
| NF-kappaB cascade                                                                 | 0.3304 bp | 0.3450399 |
| Interleukin                                                                       | 0.3316 mf | 0.3450399 |
| Protein modification                                                              | 0.3323 bp | 0.3450399 |
| JAK_STAT signaling pathway                                                        | 0.3355 pw | 0.3469375 |
| Carbohydrate kinase                                                               | 0.337 mf  | 0.3469375 |
| Carbohydrate metabolism                                                           | 0.339 bp  | 0.3469375 |
| Miscellaneous                                                                     | 0.3397 bp | 0.3469375 |
| Growth factor                                                                     | 0.3398 mf | 0.3469375 |
| Notch signaling pathway                                                           | 0.3413 pw | 0.3469375 |
| Granulocyte-mediated immunity                                                     | 0.3416 bp | 0.3469375 |
| Cell cycle                                                                        | 0.3484 pw | 0.3527414 |
| Pterin metabolism                                                                 | 0.3524 bp | 0.3556832 |
| DNA-directed RNA polymerase                                                       | 0.3538 mf | 0.3559907 |
| Synthase                                                                          | 0.3561 mf | 0.3566    |
| Protease                                                                          | 0.3566 mf | 0.3566    |
| Monosaccharide metabolism                                                         | 0.3577 bp | 0.3566028 |
| Nucleotidyltransferase                                                            | 0.3599 mf | 0.3569055 |
| Allantoin degradation                                                             | 0.3602 pw | 0.3569055 |
| Spermatogenesis and motility                                                      | 0.3645 bp | 0.3575    |
| Other cytoskeletal proteins                                                       | 0.365 mf  | 0.3575    |
| DNA methyltransferase                                                             | 0.3652 mf | 0.3575    |
| Phospholipid metabolism                                                           | 0.3656 bp | 0.3575    |
| Steroid hormone metabolism                                                        | 0.3672 bp | 0.3575    |
| Other neuronal activity                                                           | 0.3674 bp | 0.3575    |
| Enkephalin release                                                                | 0.3707 pw | 0.3590116 |
| Heterotrimeric G-protein signaling pathway-Gq alpha and Go alpha mediated pathway | 0.3719 pw | 0.3590116 |
| Coenzyme and prosthetic group metabolism                                          | 0.3727 bp | 0.3590116 |
| Disaccharide metabolism                                                           | 0.3737 bp | 0.3590116 |
| Amino acid metabolism                                                             | 0.376 bp  | 0.3590116 |
| Interferon                                                                        | 0.3763 mf | 0.3590116 |
| Other phosphatase                                                                 | 0.3767 mf | 0.3590116 |
| Translation elongation factor                                                     | 0.3785 mf | 0.3590116 |
| Mesoderm development                                                              | 0.379 bp  | 0.3590116 |
| 5-Hydroxytryptamine biosynthesis                                                  | 0.38 pw   | 0.3590116 |
| Corticotropin releasing factor receptor signaling pathway                         | 0.3843 pw | 0.3601929 |
| Cholesterol biosynthesis                                                          | 0.3873 pw | 0.3601929 |
| Insulin_IGF pathway-protein kinase B signaling cascade                            | 0.3877 pw | 0.3601929 |
| Esterase                                                                          | 0.3879 mf | 0.3601929 |
| Hsp 90 family chaperone                                                           | 0.3879 mf | 0.3601929 |
| Olfaction                                                                         | 0.3879 bp | 0.3601929 |
| Other nucleoside, nucleotide and nucleic acid metabolism                          | 0.3906 bp | 0.3604958 |
| Other developmental process                                                       | 0.3914 bp | 0.3604958 |
| Oxidoreductase                                                                    | 0.3954 mf | 0.3604958 |
| Nucleotide phosphatase                                                            | 0.3955 mf | 0.3604958 |
| Determination of dorsal_ventral axis                                              | 0.3961 bp | 0.3604958 |
| Acetylcholine receptor                                                            | 0.3965 mf | 0.3604958 |
| Other hydrolase                                                                   | 0.3969 mf | 0.3604958 |
| Homeostasis                                                                       | 0.3971 bp | 0.3604958 |
| Peroxisome transport                                                              | 0.4012 bp | 0.3625556 |
| DNA recombination                                                                 | 0.4016 bp | 0.3625556 |



|                                                                                |           |           |
|--------------------------------------------------------------------------------|-----------|-----------|
| Other steroid metabolism                                                       | 0.4081 bp | 0.366095  |
| Gametogenesis                                                                  | 0.4087 bp | 0.366095  |
| Protein phosphorylation                                                        | 0.4089 bp | 0.366095  |
| Protein biosynthesis                                                           | 0.4112 bp | 0.3671429 |
| Cell structure and motility                                                    | 0.414 bp  | 0.3674796 |
| Endodeoxyribonuclease                                                          | 0.4158 mf | 0.3674796 |
| Apolipoprotein                                                                 | 0.416 mf  | 0.3674796 |
| Regulated exocytosis                                                           | 0.4161 bp | 0.3674796 |
| Adenine and hypoxanthine salvage pathway                                       | 0.4183 pw | 0.3680712 |
| Interferon-mediated immunity                                                   | 0.4191 bp | 0.3680712 |
| CAM family adhesion molecule                                                   | 0.4207 mf | 0.3680712 |
| Acyltransferase                                                                | 0.4213 mf | 0.3680712 |
| Cell cycle control                                                             | 0.4254 bp | 0.3692717 |
| Transporter                                                                    | 0.4269 mf | 0.3692717 |
| Phosphodiesterase                                                              | 0.4293 mf | 0.3692717 |
| Gamma-aminobutyric acid synthesis                                              | 0.4293 pw | 0.3692717 |
| Voltage-gated ion channel                                                      | 0.4302 mf | 0.3692717 |
| Tyrosine biosynthesis                                                          | 0.4305 pw | 0.3692717 |
| Apoptosis                                                                      | 0.4316 bp | 0.3692717 |
| Carbohydrate transport                                                         | 0.4326 bp | 0.3692717 |
| Pheromone response                                                             | 0.4329 bp | 0.3692717 |
| Immunity and defense                                                           | 0.4371 bp | 0.3718783 |
| Protein kinase                                                                 | 0.4391 mf | 0.3726044 |
| Intermediate filament                                                          | 0.4427 mf | 0.373961  |
| Other metabolism                                                               | 0.443 bp  | 0.373961  |
| Adenylate cyclase                                                              | 0.4443 mf | 0.3740439 |
| Serine_threonine protein kinase receptor                                       | 0.4454 mf | 0.3740439 |
| TCA cycle                                                                      | 0.4468 pw | 0.3742526 |
| Other enzyme activator                                                         | 0.4496 mf | 0.3744962 |
| Phenylalanine biosynthesis                                                     | 0.4498 pw | 0.3744962 |
| Ubiquitin proteasome pathway                                                   | 0.4517 pw | 0.3744962 |
| mRNA transcription                                                             | 0.4517 bp | 0.3744962 |
| Sulfur metabolism                                                              | 0.453 bp  | 0.3746183 |
| Interleukin signaling pathway                                                  | 0.4556 pw | 0.3758122 |
| Metabolism of cyclic nucleotides                                               | 0.4573 bp | 0.3762595 |
| Heterotrimeric G-protein signaling pathway-rod outer segment phototransduction | 0.459 pw  | 0.3764106 |
| Decarboxylase                                                                  | 0.4598 mf | 0.3764106 |
| Transaminase                                                                   | 0.4644 mf | 0.3783521 |
| Toll receptor signaling pathway                                                | 0.4645 pw | 0.3783521 |
| GABA-B_receptor_II_signaling                                                   | 0.4675 pw | 0.3795449 |
| Histamine H2 receptor mediated signaling pathway                               | 0.4683 pw | 0.3795449 |
| Interleukin receptor                                                           | 0.4712 mf | 0.3809453 |
| Coenzyme metabolism                                                            | 0.4725 bp | 0.3810484 |
| Aminoacyl-tRNA synthetase                                                      | 0.4787 mf | 0.3850928 |
| Fatty acid biosynthesis                                                        | 0.4821 bp | 0.3856985 |
| Sensory perception                                                             | 0.4826 bp | 0.3856985 |
| Endogenous_cannabinoid_signaling                                               | 0.4838 pw | 0.3856985 |
| Nicotine degradation                                                           | 0.4842 pw | 0.3856985 |
| Synaptic_vesicle_trafficking                                                   | 0.4861 pw | 0.3862653 |
| Ferredoxin metabolism                                                          | 0.4877 bp | 0.3865915 |
| Pentose phosphate pathway                                                      | 0.4898 pw | 0.3873114 |
| Hearing                                                                        | 0.4935 bp | 0.38929   |
| Vasopressin synthesis                                                          | 0.4954 pw | 0.3898426 |

|                                                |           |           |
|------------------------------------------------|-----------|-----------|
| RNA helicase                                   | 0.4968 mf | 0.39      |
| Deacetylase                                    | 0.502 mf  | 0.3931325 |
| Reverse transcriptase                          | 0.5048 mf | 0.394375  |
| Translational regulation                       | 0.5093 bp | 0.3969365 |
| Guanyl-nucleotide exchange factor              | 0.5106 mf | 0.3969976 |
| Kinase modulator                               | 0.5167 mf | 0.3991647 |
| Centromere DNA-binding protein                 | 0.5175 mf | 0.3991647 |
| mRNA capping                                   | 0.518 bp  | 0.3991647 |
| Adrenaline and noradrenaline biosynthesis      | 0.5183 pw | 0.3991647 |
| Surfactant                                     | 0.5256 mf | 0.4030458 |
| NO mediated signal transduction                | 0.5265 bp | 0.4030458 |
| Other coenzyme and prosthetic group metabolism | 0.5278 bp | 0.4030458 |
| Helicase                                       | 0.5283 mf | 0.4030458 |
| Transketolase                                  | 0.5362 mf | 0.4069697 |
| Epimerase_racemase                             | 0.5365 mf | 0.4069697 |
| Synaptic transmission                          | 0.5372 bp | 0.4069697 |
| SNARE protein                                  | 0.5399 mf | 0.408064  |
| Ligase                                         | 0.5414 mf | 0.4082483 |
| Isomerase                                      | 0.5443 mf | 0.4084217 |
| Lysine biosynthesis                            | 0.5453 pw | 0.4084217 |
| Other microtubule family cytoskeletal protein  | 0.5454 mf | 0.4084217 |
| Metalloprotease inhibitor                      | 0.5568 mf | 0.4151373 |
| Gluconeogenesis                                | 0.5577 bp | 0.4151373 |
| mRNA polyadenylation                           | 0.5582 bp | 0.4151373 |
| Other intracellular signaling cascade          | 0.5622 bp | 0.416637  |
| Cytokine                                       | 0.5659 mf | 0.416637  |
| MHCI-mediated immunity                         | 0.5678 bp | 0.416637  |
| Non-motor microtubule binding protein          | 0.5689 mf | 0.416637  |
| Interferon-gamma signaling pathway             | 0.5696 pw | 0.416637  |
| Phosphorylase                                  | 0.5699 mf | 0.416637  |
| 5HT1 type receptor mediated signaling pathway  | 0.571 pw  | 0.416637  |
| JAK-STAT cascade                               | 0.5714 bp | 0.416637  |
| Select regulatory molecule                     | 0.5725 mf | 0.416637  |
| Protein folding                                | 0.5747 bp | 0.416637  |
| mRNA polyadenylation factor                    | 0.5755 mf | 0.416637  |
| Cytokine receptor                              | 0.5756 mf | 0.416637  |
| Protein-lipid modification                     | 0.5801 bp | 0.4184645 |
| Other ligand-gated ion channel                 | 0.5807 mf | 0.4184645 |
| G-protein                                      | 0.5833 mf | 0.4194082 |
| Other transporter                              | 0.5855 mf | 0.4200607 |
| Cell cycle                                     | 0.5879 bp | 0.4208535 |
| Other transport                                | 0.5926 bp | 0.4225    |
| Purine metabolism                              | 0.5928 pw | 0.4225    |
| Complement-mediated immunity                   | 0.5942 bp | 0.4225711 |
| Acyl-CoA metabolism                            | 0.5972 bp | 0.4237773 |
| Double-stranded DNA binding protein            | 0.5986 mf | 0.4238453 |
| Major histocompatibility complex antigen       | 0.6056 mf | 0.4278696 |
| Methylmalonyl pathway                          | 0.6091 pw | 0.4292532 |
| Complement component                           | 0.6102 mf | 0.4292532 |
| Arginine biosynthesis                          | 0.6116 pw | 0.4293089 |
| Intermediate filament binding protein          | 0.619 mf  | 0.4323611 |
| Cytoskeletal protein                           | 0.62 mf   | 0.4323611 |
| Formyltetrahydroformate biosynthesis           | 0.6219 pw | 0.4323611 |

|                                                                                   |           |           |
|-----------------------------------------------------------------------------------|-----------|-----------|
| Kinase                                                                            | 0.6224 mf | 0.4323611 |
| mRNA splicing factor                                                              | 0.6226 mf | 0.4323611 |
| Cation transport                                                                  | 0.6244 bp | 0.4326866 |
| Voltage-gated sodium channel                                                      | 0.6274 mf | 0.4338404 |
| Other enzyme inhibitor                                                            | 0.6303 mf | 0.4349204 |
| 2-arachidonoylglycerol biosynthesis                                               | 0.6353 pw | 0.4360872 |
| Isoleucine biosynthesis                                                           | 0.6363 pw | 0.4360872 |
| Valine biosynthesis                                                               | 0.6377 pw | 0.4360872 |
| Asparagine and aspartate biosynthesis                                             | 0.6386 pw | 0.4360872 |
| Other protein metabolism                                                          | 0.6387 bp | 0.4360872 |
| Gut mesoderm development                                                          | 0.6414 bp | 0.4364479 |
| Dehydrogenase                                                                     | 0.6435 mf | 0.4364479 |
| Heterotrimeric G-protein signaling pathway-Gi alpha and Gs alpha mediated pathway | 0.6445 pw | 0.4364479 |
| Cyclic nucleotide-gated ion channel                                               | 0.6446 mf | 0.4364479 |
| Miscellaneous function                                                            | 0.6503 mf | 0.4393919 |
| Salvage pyrimidine deoxyribonucleotides                                           | 0.6537 pw | 0.4403616 |
| General mRNA transcription activities                                             | 0.6553 bp | 0.4403616 |
| Mitochondrial transport                                                           | 0.6558 bp | 0.4403616 |
| Nuclear hormone receptor                                                          | 0.6574 mf | 0.4405258 |
| Other extracellular matrix                                                        | 0.6603 mf | 0.4415586 |
| tRNA metabolism                                                                   | 0.6621 bp | 0.4418532 |
| Pyridoxal phosphate salvage pathway                                               | 0.6675 pw | 0.4445441 |
| Phosphatase                                                                       | 0.6706 mf | 0.4451837 |
| Other cytokine receptor                                                           | 0.6712 mf | 0.4451837 |
| Blood coagulation                                                                 | 0.6753 pw | 0.4469908 |
| TGF-beta receptor                                                                 | 0.6774 mf | 0.4474695 |
| Neuropeptide                                                                      | 0.6832 mf | 0.4503854 |
| Blood clotting                                                                    | 0.6853 bp | 0.4505444 |
| Hsp 70 family chaperone                                                           | 0.6874 mf | 0.4505444 |
| Thiamine metabolism                                                               | 0.6876 pw | 0.4505444 |
| Pyrophosphatase                                                                   | 0.69 mf   | 0.45058   |
| Gap junction                                                                      | 0.6923 mf | 0.45058   |
| Anion channel                                                                     | 0.6926 mf | 0.45058   |
| Segment specification                                                             | 0.6932 bp | 0.45058   |
| Neurotransmitter release                                                          | 0.698 bp  | 0.4527944 |
| Glycogen metabolism                                                               | 0.6995 bp | 0.4528635 |
| Amino acid activation                                                             | 0.7063 bp | 0.4548725 |
| Glutamate receptor                                                                | 0.7067 mf | 0.4548725 |
| p53 pathway by glucose deprivation                                                | 0.7069 pw | 0.4548725 |
| Reverse transcription                                                             | 0.7086 bp | 0.4548725 |
| Heme biosynthesis                                                                 | 0.7105 pw | 0.4548725 |
| Other nucleic acid binding                                                        | 0.7113 mf | 0.4548725 |
| Other sensory perception                                                          | 0.7127 bp | 0.4548725 |
| Small molecule transport                                                          | 0.7138 bp | 0.4548725 |
| DNA ligase                                                                        | 0.7159 mf | 0.455318  |
| Glucosidase                                                                       | 0.7228 mf | 0.4587305 |
| Pain sensation                                                                    | 0.7254 bp | 0.4587305 |
| Opioid prodynorphin pathway                                                       | 0.7255 pw | 0.4587305 |
| Microtubule family cytoskeletal protein                                           | 0.7329 mf | 0.4603861 |
| Blood circulation and gas exchange                                                | 0.7361 bp | 0.4603861 |
| Other RNA-binding protein                                                         | 0.7379 mf | 0.4603861 |
| Mitosis                                                                           | 0.7386 bp | 0.4603861 |
| Glutamine glutamate conversion                                                    | 0.7395 pw | 0.4603861 |

|                                                             |           |           |
|-------------------------------------------------------------|-----------|-----------|
| Vitamin B6 metabolism                                       | 0.7429 pw | 0.4603861 |
| Other polysaccharide metabolism                             | 0.7433 bp | 0.4603861 |
| Cell proliferation and differentiation                      | 0.7437 bp | 0.4603861 |
| Translation initiation factor                               | 0.7446 mf | 0.4603861 |
| Other mRNA transcription                                    | 0.7449 bp | 0.4603861 |
| Non-vertebrate process                                      | 0.7454 bp | 0.4603861 |
| Transcription cofactor                                      | 0.7493 mf | 0.4603861 |
| Amino acid metabolism regulation                            | 0.7505 bp | 0.4603861 |
| ATP synthase                                                | 0.7514 mf | 0.4603861 |
| Carbohydrate transporter                                    | 0.7518 mf | 0.4603861 |
| MHCII-mediated immunity                                     | 0.752 bp  | 0.4603861 |
| Other protease inhibitor                                    | 0.7522 mf | 0.4603861 |
| Deaminase                                                   | 0.7546 mf | 0.4609868 |
| Succinate to propionate conversion                          | 0.7571 pw | 0.4613904 |
| Other proteases                                             | 0.7581 mf | 0.4613904 |
| Voltage-gated potassium channel                             | 0.7645 mf | 0.4640951 |
| DNA photolyase                                              | 0.7654 mf | 0.4640951 |
| Lactation, mammary development                              | 0.7704 bp | 0.466257  |
| Metalloprotease                                             | 0.7724 mf | 0.4665167 |
| Folate biosynthesis                                         | 0.7737 pw | 0.4665167 |
| RNA catabolism                                              | 0.7787 bp | 0.4682163 |
| Beta3 adrenergic receptor signaling pathway                 | 0.7794 pw | 0.4682163 |
| Sulfur redox metabolism                                     | 0.7831 bp | 0.469571  |
| ATP-binding cassette ABC transporter                        | 0.7906 mf | 0.4722339 |
| Other G-protein modulator                                   | 0.791 mf  | 0.4722339 |
| Polyphosphate biosynthesis                                  | 0.7919 bp | 0.4722339 |
| Mitochondrial carrier protein                               | 0.7941 mf | 0.4726786 |
| Mannose metabolism                                          | 0.7971 pw | 0.473167  |
| Nuclease                                                    | 0.798 mf  | 0.473167  |
| Chaperone                                                   | 0.8012 mf | 0.473167  |
| Acetyltransferase                                           | 0.8015 mf | 0.473167  |
| Anterior_posterior patterning                               | 0.8022 bp | 0.473167  |
| Histone                                                     | 0.8047 mf | 0.4737817 |
| Other chaperones                                            | 0.8078 mf | 0.4747468 |
| Translation release factor                                  | 0.8115 mf | 0.4760605 |
| Vitamin D metabolism and pathway                            | 0.8156 pw | 0.4776036 |
| Ubiquitin-protein ligase                                    | 0.8175 mf | 0.4778552 |
| Lipoate_biosynthesis                                        | 0.8297 pw | 0.4815436 |
| Ionotropic glutamate receptor pathway                       | 0.8312 pw | 0.4815436 |
| Leucine biosynthesis                                        | 0.832 pw  | 0.4815436 |
| Action potential propagation                                | 0.8321 bp | 0.4815436 |
| DNA metabolism                                              | 0.8326 bp | 0.4815436 |
| Alanine biosynthesis                                        | 0.8327 pw | 0.4815436 |
| Carbohydrate phosphatase                                    | 0.835 mf  | 0.482016  |
| Hematopoiesis                                               | 0.8437 bp | 0.4861746 |
| Other transcription factor                                  | 0.8478 mf | 0.4876726 |
| Protein methylation                                         | 0.8589 bp | 0.492888  |
| Other signal transduction                                   | 0.8599 bp | 0.492888  |
| KRAB box transcription factor                               | 0.872 mf  | 0.4989437 |
| O-antigen biosynthesis                                      | 0.8785 pw | 0.5012741 |
| Voltage-gated calcium channel                               | 0.8806 mf | 0.5012741 |
| Nitrogen metabolism                                         | 0.8807 bp | 0.5012741 |
| Muscarinic acetylcholine receptor 2 and 4 signaling pathway | 0.8847 pw | 0.5026705 |

|                                                   |           |           |
|---------------------------------------------------|-----------|-----------|
| Fructose galactose metabolism                     | 0.8938 pw | 0.5069546 |
| Pinocytosis                                       | 0.8977 bp | 0.5078689 |
| Dopamine receptor mediated signaling pathway      | 0.8997 pw | 0.5078689 |
| mRNA transcription initiation                     | 0.9001 bp | 0.5078689 |
| Tumor suppressor                                  | 0.9067 bp | 0.5094473 |
| Replication origin binding protein                | 0.9069 mf | 0.5094473 |
| Other ion channel                                 | 0.9076 mf | 0.5094473 |
| RNA localization                                  | 0.9098 bp | 0.5098017 |
| RNA methyltransferase                             | 0.9129 mf | 0.5099485 |
| Nucleotide kinase                                 | 0.9132 mf | 0.5099485 |
| Basal transcription factor                        | 0.916 mf  | 0.5103168 |
| Other kinase                                      | 0.917 mf  | 0.5103168 |
| Homeobox transcription factor                     | 0.9252 mf | 0.5131783 |
| Sex determination                                 | 0.9253 bp | 0.5131783 |
| Porphyrim metabolism                              | 0.9299 bp | 0.5148509 |
| Non-receptor tyrosine protein kinase              | 0.9373 mf | 0.5180655 |
| Salvage pyrimidine ribonucleotides                | 0.9412 pw | 0.5189552 |
| Oxidase                                           | 0.9429 mf | 0.5189552 |
| Reductase                                         | 0.9437 mf | 0.5189552 |
| Cyclase                                           | 0.9597 mf | 0.5268623 |
| General transcription regulation                  | 0.9619 pw | 0.5269376 |
| rRNA metabolism                                   | 0.9635 bp | 0.5269376 |
| Protein acetylation                               | 0.9654 bp | 0.5269376 |
| Glucose homeostasis                               | 0.9689 bp | 0.5269376 |
| Exoribonuclease                                   | 0.971 mf  | 0.5269376 |
| 5HT3 type receptor mediated signaling pathway     | 0.9712 pw | 0.5269376 |
| Beta1 adrenergic receptor signaling pathway       | 0.9732 pw | 0.5269376 |
| Fatty acid desaturation                           | 0.9733 bp | 0.5269376 |
| Non-receptor serine_threonine protein kinase      | 0.9777 mf | 0.5269376 |
| Metabotropic glutamate receptor group III pathway | 0.9788 pw | 0.5269376 |
| Serine glycine biosynthesis                       | 0.9819 pw | 0.5269376 |
| 5HT4 type receptor mediated signaling pathway     | 0.9832 pw | 0.5269376 |
| Beta2 adrenergic receptor signaling pathway       | 0.9835 pw | 0.5269376 |
| Metabotropic glutamate receptor group II pathway  | 0.9837 pw | 0.5269376 |
| Other enzyme regulator                            | 0.9852 mf | 0.5269376 |
| Amylase                                           | 0.9868 mf | 0.5269376 |
| Opioid proenkephalin pathway                      | 0.9874 pw | 0.5269376 |
| TGF-beta signaling pathway                        | 0.9909 pw | 0.5274877 |
| Opioid proopiomelanocortin pathway                | 0.9928 pw | 0.5274877 |
| Taste                                             | 0.9933 bp | 0.5274877 |
| Other DNA-binding protein                         | 0.9979 mf | 0.5290661 |

## 2.2 DE similarity (covariance)

| col 1                                    | col 2     | col 3 | col 4     |
|------------------------------------------|-----------|-------|-----------|
| Hydroxylase                              | 0.0007 mf |       | 0.2344891 |
| Vitamin metabolism                       | 0.0019 bp |       | 0.2344891 |
| Other protein targeting and localization | 0.0021 bp |       | 0.2344891 |
| Protease inhibitor                       | 0.0023 mf |       | 0.2344891 |
| EGF receptor signaling pathway           | 0.0024 pw |       | 0.2344891 |
| FGF signaling pathway                    | 0.003 pw  |       | 0.2344891 |
| Lysosome transport                       | 0.0041 bp |       | 0.2344891 |
| Other carbon metabolism                  | 0.005 bp  |       | 0.2344891 |
| Oogenesis                                | 0.0077 bp |       | 0.2344891 |

|                                                   |           |           |
|---------------------------------------------------|-----------|-----------|
| Muscle contraction                                | 0.0079 bp | 0.2344891 |
| Actin and actin related protein                   | 0.008 mf  | 0.2344891 |
| Steroid metabolism                                | 0.0082 bp | 0.2344891 |
| p38 MAPK pathway                                  | 0.0096 pw | 0.2344891 |
| G-protein mediated signaling                      | 0.01 bp   | 0.2344891 |
| Phosphatase modulator                             | 0.0101 mf | 0.2344891 |
| PI3 kinase pathway                                | 0.0104 pw | 0.2344891 |
| Oxidative stress response                         | 0.0109 pw | 0.2344891 |
| Parkinson disease                                 | 0.0117 pw | 0.2344891 |
| Transport                                         | 0.0118 bp | 0.2344891 |
| Protein glycosylation                             | 0.0139 bp | 0.2344891 |
| JNK cascade                                       | 0.0147 bp | 0.2344891 |
| Phenylethylamine degradation                      | 0.0149 pw | 0.2344891 |
| p53 pathway                                       | 0.0152 pw | 0.2344891 |
| Calcium mediated signaling                        | 0.0155 bp | 0.2344891 |
| Interferon receptor                               | 0.0158 mf | 0.2344891 |
| Tight junction                                    | 0.0162 mf | 0.2344891 |
| Basic helix-loop-helix transcription factor       | 0.0163 mf | 0.2344891 |
| Amino acid transporter                            | 0.017 mf  | 0.2344891 |
| Electron transport                                | 0.017 bp  | 0.2344891 |
| Aminobutyrate degradation                         | 0.0183 pw | 0.244003  |
| Tubulin                                           | 0.0215 mf | 0.2628573 |
| Lipid and fatty acid binding                      | 0.0215 bp | 0.2628573 |
| B cell activation                                 | 0.0222 pw | 0.2628573 |
| Pyruvate metabolism                               | 0.0225 pw | 0.2628573 |
| Cell adhesion                                     | 0.023 bp  | 0.2628573 |
| Vesicle coat protein                              | 0.0239 mf | 0.2655557 |
| Other transferase                                 | 0.0247 mf | 0.2670271 |
| Extracellular matrix glycoprotein                 | 0.0266 mf | 0.2678261 |
| Wnt signaling pathway                             | 0.027 pw  | 0.2678261 |
| Peroxidase                                        | 0.0286 mf | 0.2678261 |
| DNA topoisomerase                                 | 0.0302 mf | 0.2678261 |
| Dehydratase                                       | 0.0314 mf | 0.2678261 |
| T cell activation                                 | 0.0318 pw | 0.2678261 |
| Neurogenesis                                      | 0.0322 bp | 0.2678261 |
| 5-Hydroxytryptamine degradation                   | 0.0339 pw | 0.2678261 |
| MAPKKK cascade                                    | 0.0341 bp | 0.2678261 |
| Neuronal activities                               | 0.0343 bp | 0.2678261 |
| Other cell cycle process                          | 0.0344 bp | 0.2678261 |
| Myelin protein                                    | 0.0345 mf | 0.2678261 |
| Oxytocin receptor mediated signaling pathway      | 0.0345 pw | 0.2678261 |
| Muscle development                                | 0.0353 bp | 0.2678261 |
| mRNA processing factor                            | 0.0362 mf | 0.2678261 |
| Tricarboxylic acid pathway                        | 0.0369 bp | 0.2678261 |
| Receptor                                          | 0.0373 mf | 0.2678261 |
| Vitamin_cofactor transport                        | 0.0381 bp | 0.2678261 |
| Cysteine protease inhibitor                       | 0.04 mf   | 0.2678261 |
| Cell cycle                                        | 0.0409 bp | 0.2678261 |
| Other homeostasis activities                      | 0.0414 bp | 0.2678261 |
| Storage protein                                   | 0.0415 mf | 0.2678261 |
| Nucleoside, nucleotide and nucleic acid transport | 0.0422 bp | 0.2678261 |
| Transcription factor                              | 0.0425 mf | 0.2678261 |
| G-protein coupled receptor                        | 0.0431 mf | 0.2678261 |

|                                                                   |           |           |
|-------------------------------------------------------------------|-----------|-----------|
| Steroid hormone-mediated signaling                                | 0.0431 bp | 0.2678261 |
| Oxygenase                                                         | 0.0435 mf | 0.2678261 |
| Peptide hormone                                                   | 0.0438 mf | 0.2678261 |
| Huntington disease                                                | 0.0444 pw | 0.2678261 |
| Guanylate cyclase                                                 | 0.0457 mf | 0.2678261 |
| Other amino acid metabolism                                       | 0.046 bp  | 0.2678261 |
| Translation factor                                                | 0.0462 mf | 0.2678261 |
| Extracellular matrix                                              | 0.0484 mf | 0.2738028 |
| Ascorbate degradation                                             | 0.0486 pw | 0.2738028 |
| Axon guidance mediated by netrin                                  | 0.0514 pw | 0.2855556 |
| Regulated exocytosis                                              | 0.0533 bp | 0.2920548 |
| Phosphatase inhibitor                                             | 0.0568 mf | 0.3033766 |
| Cell structure                                                    | 0.0575 bp | 0.3033766 |
| Lipid and fatty acid transport                                    | 0.0582 bp | 0.3033766 |
| Cholesterol metabolism                                            | 0.0584 bp | 0.3033766 |
| mRNA splicing                                                     | 0.0606 bp | 0.3093671 |
| Axon guidance mediated by Slit_Robo                               | 0.0611 pw | 0.3093671 |
| Transfer_carrier protein                                          | 0.064 mf  | 0.3172277 |
| Cell adhesion molecule                                            | 0.0645 mf | 0.3172277 |
| Ectoderm development                                              | 0.0651 bp | 0.3172277 |
| Chaperonin                                                        | 0.0662 mf | 0.3172277 |
| Damaged DNA-binding protein                                       | 0.0668 mf | 0.3172277 |
| Primase                                                           | 0.0688 mf | 0.3172277 |
| Protein phosphatase                                               | 0.0688 mf | 0.3172277 |
| Zinc finger transcription factor                                  | 0.0701 mf | 0.3172277 |
| Hydrogen transporter                                              | 0.0708 mf | 0.3172277 |
| DNA helicase                                                      | 0.0714 mf | 0.3172277 |
| Other transfer_carrier protein                                    | 0.0714 mf | 0.3172277 |
| Embryogenesis                                                     | 0.0737 bp | 0.3172277 |
| Cell communication                                                | 0.074 bp  | 0.3172277 |
| Other carbohydrate metabolism                                     | 0.0745 bp | 0.3172277 |
| Cytokine_chemokine mediated immunity                              | 0.0753 bp | 0.3172277 |
| Phagocytosis                                                      | 0.0773 bp | 0.3172277 |
| Hedgehog signaling pathway                                        | 0.0774 pw | 0.3172277 |
| Macrophage-mediated immunity                                      | 0.0791 bp | 0.3172277 |
| DNA replication                                                   | 0.0793 pw | 0.3172277 |
| Oncogene                                                          | 0.0794 bp | 0.3172277 |
| Inflammation mediated by chemokine and cytokine signaling pathway | 0.0796 pw | 0.3172277 |
| p53 pathway feedback loops 2                                      | 0.0801 pw | 0.3172277 |
| De novo pyrimidine ribonucleotides biosynthesis                   | 0.081 pw  | 0.3176471 |
| Other receptor                                                    | 0.0823 mf | 0.3196117 |
| DNA glycosylase                                                   | 0.0841 mf | 0.3234615 |
| Serine protease inhibitor                                         | 0.0862 mf | 0.3264151 |
| FAS signaling pathway                                             | 0.0865 pw | 0.3264151 |
| Protein modification                                              | 0.0874 bp | 0.326729  |
| Extracellular matrix protein-mediated signaling                   | 0.0889 bp | 0.3290909 |
| Carbohydrate transport                                            | 0.0905 bp | 0.3290909 |
| Intracellular signaling cascade                                   | 0.0905 bp | 0.3290909 |
| Endocytosis                                                       | 0.0934 bp | 0.3346429 |
| Other membrane traffic protein                                    | 0.0937 mf | 0.3346429 |
| Hearing                                                           | 0.0962 bp | 0.3356522 |
| Cholesterol biosynthesis                                          | 0.0964 pw | 0.3356522 |
| Oxidative phosphorylation                                         | 0.0965 bp | 0.3356522 |

|                                                                                |           |           |
|--------------------------------------------------------------------------------|-----------|-----------|
| Insulin_IGF pathway-mitogen activated protein kinase kinase_MAP kinase cascade | 0.0981 pw | 0.3364103 |
| DNA replication                                                                | 0.0984 bp | 0.3364103 |
| Calmodulin related protein                                                     | 0.0995 mf | 0.3372881 |
| DNA polymerase processivity factor                                             | 0.1004 mf | 0.337479  |
| Kinase inhibitor                                                               | 0.1039 mf | 0.3418182 |
| Select calcium binding protein                                                 | 0.1045 mf | 0.3418182 |
| Mesoderm development                                                           | 0.1054 bp | 0.3418182 |
| Other metabolism                                                               | 0.1064 bp | 0.3418182 |
| Axon guidance mediated by semaphorins                                          | 0.11 pw   | 0.3418182 |
| Cell cycle                                                                     | 0.1101 pw | 0.3418182 |
| Other immune and defense                                                       | 0.1114 bp | 0.3418182 |
| Ras Pathway                                                                    | 0.1114 pw | 0.3418182 |
| Notch signaling pathway                                                        | 0.112 pw  | 0.3418182 |
| Structural protein                                                             | 0.1123 mf | 0.3418182 |
| Phosphate metabolism                                                           | 0.1134 bp | 0.3418182 |
| Calcium ion homeostasis                                                        | 0.1136 bp | 0.3418182 |
| Cadherin                                                                       | 0.1159 mf | 0.3418182 |
| Amino acid biosynthesis                                                        | 0.1162 bp | 0.3418182 |
| Other sulfur metabolism                                                        | 0.1162 bp | 0.3418182 |
| Protein-lipid modification                                                     | 0.1171 bp | 0.3418182 |
| Cell adhesion-mediated signaling                                               | 0.1179 bp | 0.3418182 |
| Amino acid catabolism                                                          | 0.1193 bp | 0.3418182 |
| Chromatin packaging and remodeling                                             | 0.1196 bp | 0.3418182 |
| Integrin signalling pathway                                                    | 0.1196 pw | 0.3418182 |
| Vision                                                                         | 0.1203 bp | 0.3418182 |
| Histamine H1 receptor mediated signaling pathway                               | 0.1214 pw | 0.3418182 |
| Signal transduction                                                            | 0.1215 bp | 0.3418182 |
| Androgen_estrogene_progesterone biosynthesis                                   | 0.1222 pw | 0.3418182 |
| Membrane traffic protein                                                       | 0.1252 mf | 0.3477778 |
| Nucleic acid binding                                                           | 0.1263 mf | 0.3484138 |
| Cytoskeletal regulation by Rho GTPase                                          | 0.1276 pw | 0.3484393 |
| Defense_immunity protein                                                       | 0.1282 mf | 0.3484393 |
| Other defense and immunity protein                                             | 0.1316 mf | 0.3484393 |
| Other cytokine                                                                 | 0.1317 mf | 0.3484393 |
| Glycolysis                                                                     | 0.1325 bp | 0.3484393 |
| Other cell adhesion molecule                                                   | 0.1329 mf | 0.3484393 |
| Pre-mRNA processing                                                            | 0.1338 bp | 0.3484393 |
| Other signaling molecule                                                       | 0.1356 mf | 0.3484393 |
| Other actin family cytoskeletal protein                                        | 0.1387 mf | 0.3484393 |
| Phosphate transport                                                            | 0.139 bp  | 0.3484393 |
| Sulfur metabolism                                                              | 0.1413 bp | 0.3484393 |
| Metabotropic glutamate receptor group I pathway                                | 0.142 pw  | 0.3484393 |
| Signaling molecule                                                             | 0.1421 mf | 0.3484393 |
| Phospholipid metabolism                                                        | 0.1422 bp | 0.3484393 |
| Cytokinesis                                                                    | 0.1425 bp | 0.3484393 |
| Extracellular matrix linker protein                                            | 0.1435 mf | 0.3484393 |
| Cadherin signaling pathway                                                     | 0.1441 pw | 0.3484393 |
| De novo pyrimidine deoxyribonucleotide biosynthesis                            | 0.1442 pw | 0.3484393 |
| Other ligase                                                                   | 0.1453 mf | 0.3484393 |
| DNA-directed DNA polymerase                                                    | 0.1459 mf | 0.3484393 |
| Adenine and hypoxanthine salvage pathway                                       | 0.1463 pw | 0.3484393 |
| Protein targeting                                                              | 0.1464 bp | 0.3484393 |
| Gamma-aminobutyric acid synthesis                                              | 0.1483 pw | 0.3484393 |



|                                                             |           |           |
|-------------------------------------------------------------|-----------|-----------|
| Apoptosis                                                   | 0.149 bp  | 0.3484393 |
| Endoribonuclease                                            | 0.1498 mf | 0.3484393 |
| Transmembrane receptor regulatory_adaptor protein           | 0.1502 mf | 0.3484393 |
| Protein phosphorylation                                     | 0.1502 bp | 0.3484393 |
| Serine protease                                             | 0.1507 mf | 0.3484393 |
| Corticotropin releasing factor receptor signaling pathway   | 0.1531 pw | 0.351954  |
| Ion channel                                                 | 0.1541 mf | 0.3522286 |
| 5HT2 type receptor mediated signaling pathway               | 0.1578 pw | 0.3524324 |
| CREB transcription factor                                   | 0.1583 mf | 0.3524324 |
| Ion transport                                               | 0.1586 bp | 0.3524324 |
| Extracellular transport and import                          | 0.1597 bp | 0.3524324 |
| Tumor necrosis factor receptor                              | 0.1601 mf | 0.3524324 |
| Lipid metabolism                                            | 0.1611 bp | 0.3524324 |
| Thyrotropin-releasing hormone receptor signaling pathway    | 0.1619 pw | 0.3524324 |
| Cell cycle control                                          | 0.162 bp  | 0.3524324 |
| Skeletal development                                        | 0.163 bp  | 0.3524324 |
| Apoptosis signaling pathway                                 | 0.163 pw  | 0.3524324 |
| Regulation of vasoconstriction, dilation                    | 0.1639 bp | 0.3524731 |
| Ribosomal protein                                           | 0.166 mf  | 0.3550802 |
| Hypoxia response via HIF activation                         | 0.1707 pw | 0.3574634 |
| Meiosis                                                     | 0.1708 bp | 0.3574634 |
| Other phosphatase                                           | 0.1722 mf | 0.3574634 |
| Carbohydrate metabolism                                     | 0.1722 bp | 0.3574634 |
| mRNA polyadenylation factor                                 | 0.173 mf  | 0.3574634 |
| Amino acid transport                                        | 0.1737 bp | 0.3574634 |
| Insulin_IGF pathway-protein kinase B signaling cascade      | 0.1745 pw | 0.3574634 |
| TCA cycle                                                   | 0.1747 pw | 0.3574634 |
| Phospholipase                                               | 0.1758 mf | 0.3574634 |
| Transferase                                                 | 0.1767 mf | 0.3574634 |
| DNA repair                                                  | 0.1771 bp | 0.3574634 |
| Muscarinic acetylcholine receptor 1 and 3 signaling pathway | 0.1795 pw | 0.3574634 |
| Membrane-bound signaling molecule                           | 0.1803 mf | 0.3574634 |
| Allantoin degradation                                       | 0.182 pw  | 0.3574634 |
| Amino acid metabolism                                       | 0.1823 bp | 0.3574634 |
| Cell motility                                               | 0.1825 bp | 0.3574634 |
| VEGF signaling pathway                                      | 0.1829 pw | 0.3574634 |
| Alpha adrenergic receptor signaling pathway                 | 0.1832 pw | 0.3574634 |
| Kinase activator                                            | 0.1855 mf | 0.3584541 |
| Cytokine and chemokine mediated signaling pathway           | 0.1855 bp | 0.3584541 |
| Cell surface receptor mediated signal transduction          | 0.1877 bp | 0.3609615 |
| Other isomerase                                             | 0.1894 mf | 0.362488  |
| Apoptotic processes                                         | 0.1939 bp | 0.36625   |
| Chemokine                                                   | 0.1955 mf | 0.36625   |
| Disaccharide metabolism                                     | 0.1958 bp | 0.36625   |
| Exodeoxyribonuclease                                        | 0.1981 mf | 0.36625   |
| Voltage-gated ion channel                                   | 0.1983 mf | 0.36625   |
| Synthase and synthetase                                     | 0.1988 mf | 0.36625   |
| General transcription by RNA polymerase I                   | 0.1996 pw | 0.36625   |
| Hydrolase                                                   | 0.2002 mf | 0.36625   |
| Protein biosynthesis                                        | 0.2007 bp | 0.36625   |
| Transcription regulation by bZIP transcription factor       | 0.2027 pw | 0.36625   |
| Immunity and defense                                        | 0.2035 bp | 0.36625   |
| HMG box transcription factor                                | 0.2039 mf | 0.36625   |

|                                                                                   |           |           |
|-----------------------------------------------------------------------------------|-----------|-----------|
| Angiogenesis                                                                      | 0.2041 pw | 0.36625   |
| Proteolysis                                                                       | 0.2047 bp | 0.36625   |
| Immunoglobulin receptor family member                                             | 0.2051 mf | 0.36625   |
| Actin binding motor protein                                                       | 0.2072 mf | 0.3664629 |
| Fatty acid metabolism                                                             | 0.2074 bp | 0.3664629 |
| Glycosidase                                                                       | 0.2093 mf | 0.3664629 |
| Pentose-phosphate shunt                                                           | 0.2097 bp | 0.3664629 |
| Induction of apoptosis                                                            | 0.2098 bp | 0.3664629 |
| Stress response                                                                   | 0.214 bp  | 0.3721739 |
| GABA receptor                                                                     | 0.2216 mf | 0.3826609 |
| P53 pathway feedback loops 1                                                      | 0.2222 pw | 0.3826609 |
| Proline biosynthesis                                                              | 0.2229 pw | 0.3826609 |
| Nucleotidyltransferase                                                            | 0.224 mf  | 0.382906  |
| Endothelin signaling pathway                                                      | 0.2258 pw | 0.3838983 |
| Circadian clock system                                                            | 0.2265 pw | 0.3838983 |
| Serine_threonine protein kinase receptor                                          | 0.2303 mf | 0.3877311 |
| Plasminogen activating cascade                                                    | 0.2307 pw | 0.3877311 |
| Chromosome segregation                                                            | 0.2318 bp | 0.3879498 |
| Glycolysis                                                                        | 0.2338 pw | 0.3879835 |
| Anion transport                                                                   | 0.2348 bp | 0.3879835 |
| Angiotensin II-stimulated signaling through G proteins and beta-arrestin          | 0.2356 pw | 0.3879835 |
| Extracellular matrix structural protein                                           | 0.2357 mf | 0.3879835 |
| Spermatogenesis and motility                                                      | 0.2381 bp | 0.3880162 |
| Alzheimer disease-presenilin pathway                                              | 0.2384 pw | 0.3880162 |
| Other miscellaneous function protein                                              | 0.2395 mf | 0.3880162 |
| Coenzyme and prosthetic group metabolism                                          | 0.2396 bp | 0.3880162 |
| Other receptor mediated signaling pathway                                         | 0.2454 bp | 0.3956226 |
| Ligand-mediated signaling                                                         | 0.2474 bp | 0.3956226 |
| Mitochondrial transport                                                           | 0.2482 bp | 0.3956226 |
| Protein disulfide-isomerase reaction                                              | 0.2495 bp | 0.3956226 |
| Antioxidation and free radical removal                                            | 0.2501 bp | 0.3956226 |
| Protein metabolism and modification                                               | 0.2513 bp | 0.3956226 |
| Synthase                                                                          | 0.2525 mf | 0.3956226 |
| Cation transporter                                                                | 0.2538 mf | 0.3956226 |
| Growth factor                                                                     | 0.2548 mf | 0.3956226 |
| Decarboxylase                                                                     | 0.2566 mf | 0.3956226 |
| Aminoacyl-tRNA synthetase                                                         | 0.2575 mf | 0.3956226 |
| Natural killer cell mediated immunity                                             | 0.2578 bp | 0.3956226 |
| Protein complex assembly                                                          | 0.2583 bp | 0.3956226 |
| Lysine biosynthesis                                                               | 0.259 pw  | 0.3956226 |
| Heterotrimeric G-protein signaling pathway-Gq alpha and Go alpha mediated pathway | 0.2597 pw | 0.3956226 |
| Cell proliferation and differentiation                                            | 0.2618 bp | 0.3956226 |
| Lyase                                                                             | 0.262 mf  | 0.3956226 |
| mRNA polyadenylation                                                              | 0.2621 bp | 0.3956226 |
| Cysteine protease                                                                 | 0.266 mf  | 0.3991045 |
| mRNA end-processing and stability                                                 | 0.2668 bp | 0.3991045 |
| Aldolase                                                                          | 0.2674 mf | 0.3991045 |
| DNA recombination                                                                 | 0.2704 bp | 0.4020818 |
| Anterior_posterior patterning                                                     | 0.2723 bp | 0.4034074 |
| Oncogenesis                                                                       | 0.2758 bp | 0.4070849 |
| Actin binding cytoskeletal protein                                                | 0.2774 mf | 0.4079412 |
| Other synthase_synthetase                                                         | 0.2873 mf | 0.4169444 |
| Other lyase                                                                       | 0.2893 mf | 0.4169444 |

|                                                          |           |           |
|----------------------------------------------------------|-----------|-----------|
| Methylmalonyl pathway                                    | 0.2901 pw | 0.4169444 |
| Mitosis                                                  | 0.2903 bp | 0.4169444 |
| CAM family adhesion molecule                             | 0.2919 mf | 0.4169444 |
| Fatty acid beta-oxidation                                | 0.2937 bp | 0.4169444 |
| General vesicle transport                                | 0.2937 bp | 0.4169444 |
| Glycosyltransferase                                      | 0.2944 mf | 0.4169444 |
| Tyrosine biosynthesis                                    | 0.2946 pw | 0.4169444 |
| G-protein modulator                                      | 0.2955 mf | 0.4169444 |
| Phenylalanine biosynthesis                               | 0.2964 pw | 0.4169444 |
| Chromatin_chromatin-binding protein                      | 0.2979 mf | 0.4169444 |
| Other cell junction protein                              | 0.2986 mf | 0.4169444 |
| Other transporter                                        | 0.299 mf  | 0.4169444 |
| Developmental processes                                  | 0.2994 bp | 0.4169444 |
| DNA-directed RNA polymerase                              | 0.3002 mf | 0.4169444 |
| Heart development                                        | 0.3025 bp | 0.4186851 |
| Receptor protein tyrosine kinase signaling pathway       | 0.3098 bp | 0.4273103 |
| Intracellular protein traffic                            | 0.3124 bp | 0.4288435 |
| Interleukin                                              | 0.314 mf  | 0.4288435 |
| Protein targeting and localization                       | 0.3144 bp | 0.4288435 |
| Vasopressin synthesis                                    | 0.3152 pw | 0.4288435 |
| Cell structure and motility                              | 0.3181 bp | 0.43      |
| Vitamin biosynthesis                                     | 0.3182 bp | 0.43      |
| Microtubule binding motor protein                        | 0.3215 mf | 0.4318121 |
| Asparagine and aspartate biosynthesis                    | 0.3217 pw | 0.4318121 |
| Lipase                                                   | 0.3258 mf | 0.4340199 |
| Endoderm development                                     | 0.3258 bp | 0.4340199 |
| Protease                                                 | 0.3266 mf | 0.4340199 |
| Other coenzyme and prosthetic group metabolism           | 0.3278 bp | 0.4341722 |
| Lipoate_biosynthesis                                     | 0.3316 pw | 0.4377558 |
| Other microtubule family cytoskeletal protein            | 0.3333 mf | 0.4385526 |
| Other nucleoside, nucleotide and nucleic acid metabolism | 0.3365 bp | 0.4394788 |
| Chemosensory perception                                  | 0.3367 bp | 0.4394788 |
| Arginine biosynthesis                                    | 0.3373 pw | 0.4394788 |
| Other enzyme activator                                   | 0.3409 mf | 0.4423077 |
| Pyrimidine metabolism                                    | 0.3418 bp | 0.4423077 |
| Endogenous_cannabinoid_signaling                         | 0.3441 pw | 0.4423077 |
| Protein folding                                          | 0.3445 bp | 0.4423077 |
| Kinase modulator                                         | 0.345 mf  | 0.4423077 |
| Pinocytosis                                              | 0.3511 bp | 0.4457321 |
| Nicotinic acetylcholine receptor signaling pathway       | 0.3542 pw | 0.4457321 |
| Neurotrophic factor                                      | 0.3543 mf | 0.4457321 |
| Other select calcium binding proteins                    | 0.3546 mf | 0.4457321 |
| Coenzyme A biosynthesis                                  | 0.3552 pw | 0.4457321 |
| Exocytosis                                               | 0.3566 bp | 0.4457321 |
| Nerve-nerve synaptic transmission                        | 0.3568 bp | 0.4457321 |
| Interferon                                               | 0.3577 mf | 0.4457321 |
| Gluconeogenesis                                          | 0.3577 bp | 0.4457321 |
| Interleukin signaling pathway                            | 0.363 pw  | 0.4509317 |
| Helicase                                                 | 0.3647 mf | 0.4516409 |
| Other apoptosis                                          | 0.3682 bp | 0.4530061 |
| Other pathways of electron transport                     | 0.3687 bp | 0.4530061 |
| Protein kinase                                           | 0.3692 mf | 0.4530061 |
| mRNA transcription termination                           | 0.3715 bp | 0.453617  |

|                                                             |           |           |
|-------------------------------------------------------------|-----------|-----------|
| Succinate to propionate conversion                          | 0.3721 pw | 0.453617  |
| Non-motor actin binding protein                             | 0.3731 mf | 0.453617  |
| DNA ligase                                                  | 0.3799 mf | 0.4604848 |
| Apolipoprotein                                              | 0.3823 mf | 0.461994  |
| Complement-mediated immunity                                | 0.3839 bp | 0.4625301 |
| Anion channel                                               | 0.3877 mf | 0.4643114 |
| Pyridoxal phosphate salvage pathway                         | 0.3877 pw | 0.4643114 |
| Formyltetrahydroformate biosynthesis                        | 0.3894 pw | 0.4649552 |
| Acetylcholine receptor                                      | 0.3918 mf | 0.466393  |
| Other polysaccharide metabolism                             | 0.3954 bp | 0.466393  |
| Pterin metabolism                                           | 0.3968 bp | 0.466393  |
| Cytoskeletal protein                                        | 0.3969 mf | 0.466393  |
| Deacetylase                                                 | 0.3971 mf | 0.466393  |
| Double-stranded DNA binding protein                         | 0.3976 mf | 0.466393  |
| Select regulatory molecule                                  | 0.3992 mf | 0.4669006 |
| Muscarinic acetylcholine receptor 2 and 4 signaling pathway | 0.4011 pw | 0.4677551 |
| Growth factor homeostasis                                   | 0.4051 bp | 0.4703768 |
| Phosphodiesterase                                           | 0.4057 mf | 0.4703768 |
| Alzheimer disease-amyloid secretase pathway                 | 0.4085 pw | 0.4710482 |
| Adenylate cyclase                                           | 0.4101 mf | 0.4710482 |
| Transporter                                                 | 0.411 mf  | 0.4710482 |
| Asymmetric protein localization                             | 0.4132 bp | 0.4710482 |
| Nuclear hormone receptor                                    | 0.4133 mf | 0.4710482 |
| Acyl-CoA metabolism                                         | 0.4141 bp | 0.4710482 |
| Pain sensation                                              | 0.4155 bp | 0.4710482 |
| Miscellaneous                                               | 0.4157 bp | 0.4710482 |
| Large G-protein                                             | 0.417 mf  | 0.4711864 |
| MHCII-mediated immunity                                     | 0.4191 bp | 0.4722254 |
| tRNA metabolism                                             | 0.4238 bp | 0.4761003 |
| B-cell- and antibody-mediated immunity                      | 0.4265 bp | 0.4761003 |
| Pyrophosphatase                                             | 0.4269 mf | 0.4761003 |
| Isomerase                                                   | 0.4273 mf | 0.4761003 |
| Other RNA-binding protein                                   | 0.4299 mf | 0.4764543 |
| Kinase                                                      | 0.43 mf   | 0.4764543 |
| Thiamine metabolism                                         | 0.435 pw  | 0.4793583 |
| Tyrosine protein kinase receptor                            | 0.4355 mf | 0.4793583 |
| Phosphorylase                                               | 0.4384 mf | 0.4793583 |
| DNA methyltransferase                                       | 0.4399 mf | 0.4793583 |
| PDGF signaling pathway                                      | 0.4423 pw | 0.4793583 |
| Endodeoxyribonuclease                                       | 0.4424 mf | 0.4793583 |
| Angiogenesis                                                | 0.4431 bp | 0.4793583 |
| Translation elongation factor                               | 0.4442 mf | 0.4793583 |
| Other intracellular protein traffic                         | 0.4454 bp | 0.4793583 |
| Interferon-mediated immunity                                | 0.4474 bp | 0.4793583 |
| Amino acid activation                                       | 0.4478 bp | 0.4793583 |
| Reverse transcriptase                                       | 0.4479 mf | 0.4793583 |
| Interleukin receptor                                        | 0.4482 mf | 0.4793583 |
| Toll receptor signaling pathway                             | 0.4494 pw | 0.47936   |
| Annexin                                                     | 0.4513 mf | 0.4801064 |
| Surfactant                                                  | 0.4551 mf | 0.4828647 |
| Nucleotide phosphatase                                      | 0.4571 mf | 0.4837037 |
| Valine biosynthesis                                         | 0.4637 pw | 0.4878351 |
| Other cytokine receptor                                     | 0.4659 mf | 0.4878351 |

|                                                  |           |           |
|--------------------------------------------------|-----------|-----------|
| Intermediate filament binding protein            | 0.4665 mf | 0.4878351 |
| T-cell mediated immunity                         | 0.4681 bp | 0.4878351 |
| Other ligand-gated ion channel                   | 0.4695 mf | 0.4878351 |
| Translational regulation                         | 0.4704 bp | 0.4878351 |
| Small GTPase                                     | 0.4714 mf | 0.4878351 |
| mRNA capping                                     | 0.4717 bp | 0.4878351 |
| Isoleucine biosynthesis                          | 0.4722 pw | 0.4878351 |
| Mutase                                           | 0.4732 mf | 0.4878351 |
| Vitamin D metabolism and pathway                 | 0.4762 pw | 0.4896658 |
| mRNA transcription elongation                    | 0.48 bp   | 0.4923077 |
| Action potential propagation                     | 0.4823 bp | 0.4926209 |
| Other oncogenesis                                | 0.4831 bp | 0.4926209 |
| Other hydrolase                                  | 0.484 mf  | 0.4926209 |
| Synaptic_vesicle_trafficking                     | 0.4866 pw | 0.4930633 |
| Other cytoskeletal proteins                      | 0.4869 mf | 0.4930633 |
| Sensory perception                               | 0.4913 bp | 0.4950126 |
| Ubiquitin proteasome pathway                     | 0.4913 pw | 0.4950126 |
| Intermediate filament                            | 0.4983 mf | 0.5002494 |
| Cytokine                                         | 0.5004 mf | 0.5002494 |
| ATP synthesis                                    | 0.5004 pw | 0.5002494 |
| Glutamine glutamate conversion                   | 0.5015 pw | 0.5002494 |
| General mRNA transcription activities            | 0.5028 bp | 0.5002985 |
| Histamine H2 receptor mediated signaling pathway | 0.5072 pw | 0.5034243 |
| Granulocyte-mediated immunity                    | 0.5111 bp | 0.5060396 |
| Regulation of phosphate metabolism               | 0.5187 bp | 0.5113171 |
| Interferon-gamma signaling pathway               | 0.5207 pw | 0.5113171 |
| Other developmental process                      | 0.5226 bp | 0.5113171 |
| Centromere DNA-binding protein                   | 0.5228 mf | 0.5113171 |
| Gut mesoderm development                         | 0.5241 bp | 0.5113171 |
| Other intracellular signaling cascade            | 0.5241 bp | 0.5113171 |
| Dopamine receptor mediated signaling pathway     | 0.5258 pw | 0.5117275 |
| Single-stranded DNA-binding protein              | 0.5281 mf | 0.5127184 |
| Nuclease                                         | 0.5324 mf | 0.5128741 |
| Tumor suppressor                                 | 0.5329 bp | 0.5128741 |
| Other oxidoreductase                             | 0.5348 mf | 0.5128741 |
| Other enzyme inhibitor                           | 0.5352 mf | 0.5128741 |
| Gametogenesis                                    | 0.5364 bp | 0.5128741 |
| Neurotransmitter release                         | 0.5368 bp | 0.5128741 |
| Steroid hormone metabolism                       | 0.5388 bp | 0.5128741 |
| Enkephalin release                               | 0.539 pw  | 0.5128741 |
| Vitamin B6 metabolism                            | 0.5398 pw | 0.5128741 |
| Ligase                                           | 0.5451 mf | 0.5166825 |
| Pheromone response                               | 0.5484 bp | 0.5174528 |
| Beta3 adrenergic receptor signaling pathway      | 0.5485 pw | 0.5174528 |
| Voltage-gated sodium channel                     | 0.5542 mf | 0.5201874 |
| Segment specification                            | 0.5547 bp | 0.5201874 |
| Translation release factor                       | 0.5553 mf | 0.5201874 |
| Beta2 adrenergic receptor signaling pathway      | 0.5609 pw | 0.5225806 |
| Fertilization                                    | 0.5615 bp | 0.5225806 |
| JAK-STAT cascade                                 | 0.5624 bp | 0.5225806 |
| Beta1 adrenergic receptor signaling pathway      | 0.5661 pw | 0.5225806 |
| Aspartic protease                                | 0.5666 mf | 0.5225806 |
| Hematopoiesis                                    | 0.5667 bp | 0.5225806 |

|                                                            |           |           |
|------------------------------------------------------------|-----------|-----------|
| Synaptic transmission                                      | 0.567 bp  | 0.5225806 |
| Ribonucleoprotein                                          | 0.5722 mf | 0.5248182 |
| 5HT4 type receptor mediated signaling pathway              | 0.5756 pw | 0.5248182 |
| Purine metabolism                                          | 0.5758 bp | 0.5248182 |
| O-antigen biosynthesis                                     | 0.5758 pw | 0.5248182 |
| Heme biosynthesis                                          | 0.5767 pw | 0.5248182 |
| Methylcitrate cycle                                        | 0.5773 pw | 0.5248182 |
| RNA helicase                                               | 0.58 mf   | 0.5260771 |
| Antibacterial response protein                             | 0.5824 mf | 0.5270588 |
| Detoxification                                             | 0.5875 bp | 0.5295495 |
| Other proteases                                            | 0.5878 mf | 0.5295495 |
| Hsp 70 family chaperone                                    | 0.6019 mf | 0.5383007 |
| De novo purine biosynthesis                                | 0.6032 pw | 0.5383007 |
| Acetyltransferase                                          | 0.604 mf  | 0.5383007 |
| MHCI-mediated immunity                                     | 0.606 bp  | 0.5383007 |
| Cyclic nucleotide-gated ion channel                        | 0.6084 mf | 0.5383007 |
| Immunoglobulin                                             | 0.609 mf  | 0.5383007 |
| Major histocompatibility complex antigen                   | 0.6091 mf | 0.5383007 |
| Determination of dorsal_ventral axis                       | 0.6109 bp | 0.5383007 |
| mRNA transcription                                         | 0.6118 bp | 0.5383007 |
| Neuromuscular synaptic transmission                        | 0.6132 bp | 0.5383007 |
| Receptor protein serine_threonine kinase signaling pathway | 0.6145 bp | 0.5383007 |
| Nitrogen metabolism                                        | 0.6149 bp | 0.5383007 |
| Tumor necrosis factor family member                        | 0.616 mf  | 0.5383007 |
| Other nucleic acid binding                                 | 0.6168 mf | 0.5383007 |
| Metabolism of cyclic nucleotides                           | 0.6177 bp | 0.5383007 |
| RNA catabolism                                             | 0.6239 bp | 0.5425217 |
| Synthetase                                                 | 0.6283 mf | 0.5451627 |
| Homeostasis                                                | 0.637 bp  | 0.5515152 |
| Other blood circulation and gas exchange activity          | 0.6409 bp | 0.552618  |
| Peroxisome transport                                       | 0.6411 bp | 0.552618  |
| Transaminase                                               | 0.6438 mf | 0.552618  |
| p53 pathway by glucose deprivation                         | 0.6438 pw | 0.552618  |
| Cell junction protein                                      | 0.6463 mf | 0.553576  |
| Replication origin binding protein                         | 0.6529 mf | 0.5580342 |
| Other transport                                            | 0.6547 bp | 0.5583795 |
| ATP synthase                                               | 0.6587 mf | 0.5605957 |
| Chaperone                                                  | 0.6731 mf | 0.56827   |
| Deaminase                                                  | 0.6731 mf | 0.56827   |
| Histone                                                    | 0.6734 mf | 0.56827   |
| Nucleotide kinase                                          | 0.6734 mf | 0.56827   |
| Translation initiation factor                              | 0.6758 mf | 0.5684034 |
| Porphyrim metabolism                                       | 0.6764 bp | 0.5684034 |
| Non-receptor serine_threonine protein kinase               | 0.6792 mf | 0.5693724 |
| NF-kappaB cascade                                          | 0.6804 bp | 0.5693724 |
| Xanthine and guanine salvage pathway                       | 0.6823 pw | 0.5697704 |
| Inhibition of apoptosis                                    | 0.687 bp  | 0.5718919 |
| Pyrimidine Metabolism                                      | 0.6877 pw | 0.5718919 |
| Glucosidase                                                | 0.6903 mf | 0.5728631 |
| 5-Hydroxytryptamine biosynthesis                           | 0.6928 pw | 0.5733333 |
| Reductase                                                  | 0.6948 mf | 0.5733333 |
| Olfaction                                                  | 0.6961 bp | 0.5733333 |
| Ferredoxin metabolism                                      | 0.6966 bp | 0.5733333 |

|                                                                                   |           |           |
|-----------------------------------------------------------------------------------|-----------|-----------|
| Acyltransferase                                                                   | 0.7005 mf | 0.574664  |
| Other signal transduction                                                         | 0.7021 bp | 0.574664  |
| Other protein metabolism                                                          | 0.7031 bp | 0.574664  |
| Fatty acid biosynthesis                                                           | 0.7042 bp | 0.574664  |
| GABA-B_receptor_II_signaling                                                      | 0.7054 pw | 0.574664  |
| Opioid prodynorphin pathway                                                       | 0.7094 pw | 0.5749194 |
| Membrane traffic regulatory protein                                               | 0.7095 mf | 0.5749194 |
| Transketolase                                                                     | 0.7109 mf | 0.5749194 |
| Sulfur redox metabolism                                                           | 0.7126 bp | 0.5749194 |
| Metalloprotease inhibitor                                                         | 0.7129 mf | 0.5749194 |
| G-protein                                                                         | 0.7154 mf | 0.5749398 |
| Receptor mediated endocytosis                                                     | 0.7158 bp | 0.5749398 |
| Voltage-gated potassium channel                                                   | 0.7191 mf | 0.5756693 |
| Nicotine degradation                                                              | 0.7221 pw | 0.5756693 |
| TGF-beta receptor                                                                 | 0.7227 mf | 0.5756693 |
| Regulation of carbohydrate metabolism                                             | 0.7231 bp | 0.5756693 |
| Guanyl-nucleotide exchange factor                                                 | 0.7241 mf | 0.5756693 |
| Oxidoreductase                                                                    | 0.726 mf  | 0.5756693 |
| Complement component                                                              | 0.7283 mf | 0.5756693 |
| NO mediated signal transduction                                                   | 0.7304 bp | 0.5756693 |
| Epimerase_racemase                                                                | 0.7307 mf | 0.5756693 |
| Miscellaneous function                                                            | 0.7311 mf | 0.5756693 |
| Nitric oxide biosynthesis                                                         | 0.7329 bp | 0.5759528 |
| Basal transcription factor                                                        | 0.736 mf  | 0.5772549 |
| Methyltransferase                                                                 | 0.7437 mf | 0.5810937 |
| 2-arachidonoylglycerol biosynthesis                                               | 0.7438 pw | 0.5810937 |
| DNA photolyase                                                                    | 0.7498 mf | 0.5846394 |
| ATP-binding cassette ABC transporter                                              | 0.7576 mf | 0.5892248 |
| Gap junction                                                                      | 0.7592 mf | 0.5892248 |
| Adrenaline and noradrenaline biosynthesis                                         | 0.7601 pw | 0.5892248 |
| Coenzyme metabolism                                                               | 0.7653 bp | 0.5896552 |
| Exoribonuclease                                                                   | 0.7677 mf | 0.5896552 |
| Cytokine receptor                                                                 | 0.7685 mf | 0.5896552 |
| Carnitine metabolism                                                              | 0.7689 pw | 0.5896552 |
| Carnitine and CoA metabolism                                                      | 0.7694 pw | 0.5896552 |
| Hsp 90 family chaperone                                                           | 0.7695 mf | 0.5896552 |
| Non-vertebrate process                                                            | 0.7754 bp | 0.591619  |
| Blood coagulation                                                                 | 0.7763 pw | 0.591619  |
| N-acetylglucosamine metabolism                                                    | 0.7765 pw | 0.591619  |
| Lactation, mammary development                                                    | 0.7815 bp | 0.5942966 |
| Oxidase                                                                           | 0.7894 mf | 0.5953383 |
| Microtubule family cytoskeletal protein                                           | 0.7898 mf | 0.5953383 |
| Mitochondrial carrier protein                                                     | 0.7899 mf | 0.5953383 |
| Other ion channel                                                                 | 0.7899 mf | 0.5953383 |
| TGF-beta signaling pathway                                                        | 0.7915 pw | 0.5953383 |
| Heterotrimeric G-protein signaling pathway-Gi alpha and Gs alpha mediated pathway | 0.7918 pw | 0.5953383 |
| Other chaperones                                                                  | 0.7948 mf | 0.5957383 |
| Other sensory perception                                                          | 0.7956 bp | 0.5957383 |
| Other neuronal activity                                                           | 0.7968 bp | 0.5957383 |
| Small molecule transport                                                          | 0.8025 bp | 0.5988806 |
| Ionotropic glutamate receptor pathway                                             | 0.8143 pw | 0.6054815 |
| Glutamate receptor                                                                | 0.8169 mf | 0.6054815 |
| Other protease inhibitor                                                          | 0.8169 mf | 0.6054815 |

|                                                                                |           |           |
|--------------------------------------------------------------------------------|-----------|-----------|
| Blood circulation and gas exchange                                             | 0.8174 bp | 0.6054815 |
| JAK_STAT signaling pathway                                                     | 0.8236 pw | 0.6084133 |
| Carbohydrate transporter                                                       | 0.8244 mf | 0.6084133 |
| Monosaccharide metabolism                                                      | 0.8273 bp | 0.6094291 |
| Transcription cofactor                                                         | 0.8311 mf | 0.6101989 |
| Cation transport                                                               | 0.8333 bp | 0.6101989 |
| Metalloprotease                                                                | 0.8362 mf | 0.6101989 |
| mRNA splicing                                                                  | 0.8391 pw | 0.6101989 |
| Constitutive exocytosis                                                        | 0.8392 bp | 0.6101989 |
| mRNA splicing factor                                                           | 0.8394 mf | 0.6101989 |
| Phosphatase                                                                    | 0.8398 mf | 0.6101989 |
| Protein ADP-ribosylation                                                       | 0.8416 bp | 0.6101989 |
| Other steroid metabolism                                                       | 0.8431 bp | 0.6101989 |
| Other G-protein modulator                                                      | 0.8436 mf | 0.6101989 |
| Ubiquitin-protein ligase                                                       | 0.8475 mf | 0.6114387 |
| Hydratase                                                                      | 0.8521 mf | 0.6114387 |
| Nuclear transport                                                              | 0.8526 bp | 0.6114387 |
| Heterotrimeric G-protein signaling pathway-rod outer segment phototransduction | 0.8548 pw | 0.6114387 |
| Pentose phosphate pathway                                                      | 0.8551 pw | 0.6114387 |
| Voltage-gated calcium channel                                                  | 0.8582 mf | 0.6114387 |
| Esterase                                                                       | 0.8583 mf | 0.6114387 |
| Dehydrogenase                                                                  | 0.8592 mf | 0.6114387 |
| Salvage pyrimidine deoxyribonucleotides                                        | 0.8593 pw | 0.6114387 |
| mRNA transcription initiation                                                  | 0.8606 bp | 0.6114387 |
| Acetate utilization                                                            | 0.8626 pw | 0.611773  |
| KRAB box transcription factor                                                  | 0.8684 mf | 0.6147965 |
| Carbohydrate phosphatase                                                       | 0.8736 mf | 0.6156338 |
| Other mRNA transcription                                                       | 0.8739 bp | 0.6156338 |
| Polyphosphate biosynthesis                                                     | 0.8742 bp | 0.6156338 |
| Other zinc finger transcription factor                                         | 0.8784 mf | 0.6175044 |
| Non-motor microtubule binding protein                                          | 0.8828 mf | 0.6195088 |
| RNA methyltransferase                                                          | 0.8858 mf | 0.6205254 |
| Mannose metabolism                                                             | 0.8874 pw | 0.6205594 |
| Other extracellular matrix                                                     | 0.89 mf   | 0.6212914 |
| DNA degradation                                                                | 0.8918 bp | 0.6214634 |
| rRNA metabolism                                                                | 0.8963 bp | 0.623513  |
| SNARE protein                                                                  | 0.9029 mf | 0.6246632 |
| Other kinase                                                                   | 0.903 mf  | 0.6246632 |
| Neuropeptide                                                                   | 0.9033 mf | 0.6246632 |
| DNA metabolism                                                                 | 0.9042 bp | 0.6246632 |
| Protein methylation                                                            | 0.9165 bp | 0.6305155 |
| 5HT1 type receptor mediated signaling pathway                                  | 0.9166 pw | 0.6305155 |
| Purine metabolism                                                              | 0.9174 pw | 0.6305155 |
| 5HT3 type receptor mediated signaling pathway                                  | 0.9208 pw | 0.6317667 |
| Non-receptor tyrosine protein kinase                                           | 0.9228 mf | 0.6320548 |
| Fructose galactose metabolism                                                  | 0.9246 pw | 0.6322051 |
| Leucine biosynthesis                                                           | 0.9278 pw | 0.6328257 |
| Carbohydrate kinase                                                            | 0.9288 mf | 0.6328257 |
| Blood clotting                                                                 | 0.9308 bp | 0.6328257 |
| Alanine biosynthesis                                                           | 0.9335 pw | 0.6328257 |
| Sex determination                                                              | 0.9349 bp | 0.6328257 |
| Folate biosynthesis                                                            | 0.935 pw  | 0.6328257 |
| Reverse transcription                                                          | 0.9377 bp | 0.6335811 |



|                                                   |           |           |
|---------------------------------------------------|-----------|-----------|
| RNA localization                                  | 0.9456 bp | 0.6378415 |
| General transcription regulation                  | 0.9489 pw | 0.6389899 |
| Amino acid metabolism regulation                  | 0.9543 bp | 0.6415462 |
| Galactosidase                                     | 0.9571 mf | 0.6416054 |
| Fatty acid desaturation                           | 0.958 bp  | 0.6416054 |
| Opioid proopiomelanocortin pathway                | 0.9592 pw | 0.6416054 |
| Homeobox transcription factor                     | 0.963 mf  | 0.6430718 |
| Other transcription factor                        | 0.9669 mf | 0.6431229 |
| Opioid proenkephalin pathway                      | 0.9672 pw | 0.6431229 |
| Metabotropic glutamate receptor group III pathway | 0.9679 pw | 0.6431229 |
| Salvage pyrimidine ribonucleotides                | 0.973 pw  | 0.6454395 |
| Metabotropic glutamate receptor group II pathway  | 0.9752 pw | 0.6458278 |
| Cyclase                                           | 0.9778 mf | 0.6462706 |
| Amylase                                           | 0.9791 mf | 0.6462706 |
| Glycogen metabolism                               | 0.9839 bp | 0.648369  |
| Protein acetylation                               | 0.9903 bp | 0.6510458 |
| Other enzyme regulator                            | 0.9945 mf | 0.6510458 |
| Serine glycine biosynthesis                       | 0.995 pw  | 0.6510458 |
| Glucose homeostasis                               | 0.9953 bp | 0.6510458 |
| Taste                                             | 0.9961 bp | 0.6510458 |
| Other DNA-binding protein                         | 0.9996 mf | 0.6522675 |

### 2.3 DE similarity (dot product)

| <b>col 1</b>                             | <b>col 2 col 3</b> | <b>col 4</b> |
|------------------------------------------|--------------------|--------------|
| Cell adhesion                            | 0.0016 bp          | 0.2423071    |
| Transport                                | 0.002 bp           | 0.2423071    |
| Wnt signaling pathway                    | 0.0023 pw          | 0.2423071    |
| Cell structure                           | 0.0026 bp          | 0.2423071    |
| Other protein targeting and localization | 0.0037 bp          | 0.2423071    |
| G-protein mediated signaling             | 0.0039 bp          | 0.2423071    |
| Vitamin metabolism                       | 0.0048 bp          | 0.2423071    |
| Protease inhibitor                       | 0.0057 mf          | 0.2423071    |
| Hydroxylase                              | 0.0059 mf          | 0.2423071    |
| DNA replication                          | 0.0074 bp          | 0.2423071    |
| EGF receptor signaling pathway           | 0.0081 pw          | 0.2423071    |
| Amino acid transporter                   | 0.0084 mf          | 0.2423071    |
| Lipid and fatty acid binding             | 0.0092 bp          | 0.2423071    |
| FGF signaling pathway                    | 0.0099 pw          | 0.2423071    |
| G-protein coupled receptor               | 0.01 mf            | 0.2423071    |
| Parkinson disease                        | 0.0106 pw          | 0.2423071    |
| Actin and actin related protein          | 0.0107 mf          | 0.2423071    |
| Muscle contraction                       | 0.0114 bp          | 0.2423071    |
| Lipid and fatty acid transport           | 0.0115 bp          | 0.2423071    |
| Amino acid biosynthesis                  | 0.0131 bp          | 0.2615385    |
| Phosphatase modulator                    | 0.0142 mf          | 0.2615385    |
| Cell adhesion-mediated signaling         | 0.0146 bp          | 0.2615385    |
| Oogenesis                                | 0.0162 bp          | 0.2615385    |
| Tight junction                           | 0.0165 mf          | 0.2615385    |
| Vitamin_cofactor transport               | 0.0169 bp          | 0.2615385    |
| Cytokinesis                              | 0.017 bp           | 0.2615385    |
| Steroid metabolism                       | 0.0201 bp          | 0.2615385    |
| Other lyase                              | 0.0203 mf          | 0.2615385    |
| Extracellular matrix glycoprotein        | 0.021 mf           | 0.2615385    |

|                                                                   |           |           |
|-------------------------------------------------------------------|-----------|-----------|
| Endocytosis                                                       | 0.0214 bp | 0.2615385 |
| Steroid hormone-mediated signaling                                | 0.0219 bp | 0.2615385 |
| Embryogenesis                                                     | 0.0223 bp | 0.2615385 |
| DNA replication                                                   | 0.0231 pw | 0.2615385 |
| Interferon receptor                                               | 0.0235 mf | 0.2615385 |
| Peptide hormone                                                   | 0.0243 mf | 0.2615385 |
| Neurogenesis                                                      | 0.0243 bp | 0.2615385 |
| Myelin protein                                                    | 0.0271 mf | 0.2615385 |
| Exocytosis                                                        | 0.0272 bp | 0.2615385 |
| Ectoderm development                                              | 0.0274 bp | 0.2615385 |
| Lysosome transport                                                | 0.0276 bp | 0.2615385 |
| Phenylethylamine degradation                                      | 0.0287 pw | 0.2615385 |
| Vesicle coat protein                                              | 0.0295 mf | 0.2615385 |
| DNA topoisomerase                                                 | 0.03 mf   | 0.2615385 |
| Proteolysis                                                       | 0.0303 bp | 0.2615385 |
| Basic helix-loop-helix transcription factor                       | 0.0309 mf | 0.2615385 |
| Cell motility                                                     | 0.0315 bp | 0.2615385 |
| mRNA processing factor                                            | 0.0322 mf | 0.2615385 |
| Signal transduction                                               | 0.0328 bp | 0.2615385 |
| Tubulin                                                           | 0.0331 mf | 0.2615385 |
| Zinc finger transcription factor                                  | 0.0335 mf | 0.2615385 |
| Protein glycosylation                                             | 0.0336 bp | 0.2615385 |
| Calcium mediated signaling                                        | 0.034 bp  | 0.2615385 |
| Oxygenase                                                         | 0.0357 mf | 0.265     |
| PI3 kinase pathway                                                | 0.0366 pw | 0.265     |
| Hedgehog signaling pathway                                        | 0.0369 pw | 0.265     |
| Amino acid transport                                              | 0.0371 bp | 0.265     |
| Electron transport                                                | 0.0391 bp | 0.274386  |
| HMG box transcription factor                                      | 0.0428 mf | 0.2901695 |
| Other carbon metabolism                                           | 0.0428 bp | 0.2901695 |
| Phagocytosis                                                      | 0.0456 bp | 0.2984615 |
| Cadherin signaling pathway                                        | 0.0462 pw | 0.2984615 |
| Dehydratase                                                       | 0.0463 mf | 0.2984615 |
| Other transferase                                                 | 0.0476 mf | 0.2984615 |
| p53 pathway                                                       | 0.0484 pw | 0.2984615 |
| Other immune and defense                                          | 0.0485 bp | 0.2984615 |
| Peroxidase                                                        | 0.0507 mf | 0.3068571 |
| 5-Hydroxytryptamine degradation                                   | 0.0528 pw | 0.3068571 |
| Cysteine protease inhibitor                                       | 0.053 mf  | 0.3068571 |
| Guanylate cyclase                                                 | 0.0531 mf | 0.3068571 |
| Other receptor                                                    | 0.0537 mf | 0.3068571 |
| Extracellular matrix structural protein                           | 0.0549 mf | 0.3092958 |
| Receptor                                                          | 0.0586 mf | 0.3255556 |
| Other transfer_carrier protein                                    | 0.0595 mf | 0.3260274 |
| FAS signaling pathway                                             | 0.0617 pw | 0.3293458 |
| Extracellular matrix                                              | 0.0622 mf | 0.3293458 |
| Metabotropic glutamate receptor group I pathway                   | 0.064 pw  | 0.3293458 |
| Inflammation mediated by chemokine and cytokine signaling pathway | 0.0654 pw | 0.3293458 |
| Transcription factor                                              | 0.0656 mf | 0.3293458 |
| Serine protease inhibitor                                         | 0.0659 mf | 0.3293458 |
| Aminobutyrate degradation                                         | 0.0667 pw | 0.3293458 |
| Storage protein                                                   | 0.0672 mf | 0.3293458 |
| Phosphatase inhibitor                                             | 0.0696 mf | 0.3293458 |

|                                                  |           |           |
|--------------------------------------------------|-----------|-----------|
| Huntington disease                               | 0.0701 pw | 0.3293458 |
| mRNA splicing                                    | 0.0702 bp | 0.3293458 |
| B cell activation                                | 0.0714 pw | 0.3293458 |
| Translation factor                               | 0.0736 mf | 0.3293458 |
| Growth factor homeostasis                        | 0.0741 bp | 0.3293458 |
| Cell adhesion molecule                           | 0.0744 mf | 0.3293458 |
| T cell activation                                | 0.0746 pw | 0.3293458 |
| General vesicle transport                        | 0.0756 bp | 0.3293458 |
| DNA helicase                                     | 0.0763 mf | 0.3293458 |
| Neuronal activities                              | 0.0776 bp | 0.3293458 |
| Cytokine_chemokine mediated immunity             | 0.0786 bp | 0.3293458 |
| Phosphate metabolism                             | 0.0788 bp | 0.3293458 |
| Alpha adrenergic receptor signaling pathway      | 0.0788 pw | 0.3293458 |
| Apoptotic processes                              | 0.0796 bp | 0.3293458 |
| Angiogenesis                                     | 0.0817 pw | 0.3293458 |
| DNA repair                                       | 0.0822 bp | 0.3293458 |
| Induction of apoptosis                           | 0.0823 bp | 0.3293458 |
| Primase                                          | 0.0838 mf | 0.3293458 |
| Cadherin                                         | 0.0848 mf | 0.3293458 |
| Chaperonin                                       | 0.085 mf  | 0.3293458 |
| Transfer_carrier protein                         | 0.0857 mf | 0.3293458 |
| Membrane traffic protein                         | 0.0858 mf | 0.3293458 |
| VEGF signaling pathway                           | 0.0874 pw | 0.3293458 |
| Histamine H1 receptor mediated signaling pathway | 0.088 pw  | 0.3293458 |
| Chromatin packaging and remodeling               | 0.0881 bp | 0.3293458 |
| Carnitine and CoA metabolism                     | 0.0898 pw | 0.3300901 |
| Fatty acid metabolism                            | 0.09 bp   | 0.3300901 |
| Methylcitrate cycle                              | 0.091 pw  | 0.3300901 |
| Carnitine metabolism                             | 0.0916 pw | 0.3300901 |
| Actin binding motor protein                      | 0.0945 mf | 0.3375    |
| Developmental processes                          | 0.0957 bp | 0.3387611 |
| Hydrogen transporter                             | 0.0972 mf | 0.3389655 |
| Damaged DNA-binding protein                      | 0.0979 mf | 0.3389655 |
| Cholesterol metabolism                           | 0.0983 bp | 0.3389655 |
| Other amino acid metabolism                      | 0.1002 bp | 0.342521  |
| Actin binding cytoskeletal protein               | 0.1012 mf | 0.342521  |
| Other sulfur metabolism                          | 0.1019 bp | 0.342521  |
| Cell communication                               | 0.1031 bp | 0.3436667 |
| Other defense and immunity protein               | 0.107 mf  | 0.3511811 |
| Acetate utilization                              | 0.1086 pw | 0.3511811 |
| Oncogenesis                                      | 0.1091 bp | 0.3511811 |
| DNA glycosylase                                  | 0.1097 mf | 0.3511811 |
| Nitric oxide biosynthesis                        | 0.1108 bp | 0.3511811 |
| Other homeostasis activities                     | 0.1112 bp | 0.3511811 |
| Amino acid catabolism                            | 0.1115 bp | 0.3511811 |
| De novo pyrimidine ribonucleotides biosynthesis  | 0.1141 pw | 0.3557447 |
| p53 pathway feedback loops 2                     | 0.1163 pw | 0.3557447 |
| Phospholipase                                    | 0.1184 mf | 0.3557447 |
| Regulated exocytosis                             | 0.1193 bp | 0.3557447 |
| Select calcium binding protein                   | 0.12 mf   | 0.3557447 |
| Cell cycle                                       | 0.1201 bp | 0.3557447 |
| Pyrimidine Metabolism                            | 0.122 pw  | 0.3557447 |
| Macrophage-mediated immunity                     | 0.1223 bp | 0.3557447 |

|                                                                          |           |           |
|--------------------------------------------------------------------------|-----------|-----------|
| Inhibition of apoptosis                                                  | 0.1225 bp | 0.3557447 |
| DNA polymerase processivity factor                                       | 0.1231 mf | 0.3557447 |
| Androgen_estrogene_progesterone biosynthesis                             | 0.1241 pw | 0.3557447 |
| Alzheimer disease-presenilin pathway                                     | 0.1243 pw | 0.3557447 |
| Proline biosynthesis                                                     | 0.1248 pw | 0.3557447 |
| De novo pyrimidine deoxyribonucleotide biosynthesis                      | 0.1254 pw | 0.3557447 |
| Calcium ion homeostasis                                                  | 0.1278 bp | 0.3583217 |
| Muscarinic acetylcholine receptor 1 and 3 signaling pathway              | 0.1281 pw | 0.3583217 |
| Tricarboxylic acid pathway                                               | 0.1322 bp | 0.3587342 |
| Receptor protein serine_threonine kinase signaling pathway               | 0.1325 bp | 0.3587342 |
| Other receptor mediated signaling pathway                                | 0.1336 bp | 0.3587342 |
| Chromosome segregation                                                   | 0.1338 bp | 0.3587342 |
| Other blood circulation and gas exchange activity                        | 0.1338 bp | 0.3587342 |
| Calmodulin related protein                                               | 0.1346 mf | 0.3587342 |
| Cell surface receptor mediated signal transduction                       | 0.136 bp  | 0.3587342 |
| Extracellular matrix protein-mediated signaling                          | 0.1363 bp | 0.3587342 |
| Membrane-bound signaling molecule                                        | 0.1373 mf | 0.3587342 |
| Hypoxia response via HIF activation                                      | 0.1391 pw | 0.3587342 |
| Receptor protein tyrosine kinase signaling pathway                       | 0.1395 bp | 0.3587342 |
| Receptor mediated endocytosis                                            | 0.1404 bp | 0.3587342 |
| Nerve-nerve synaptic transmission                                        | 0.1408 bp | 0.3587342 |
| Extracellular transport and import                                       | 0.1409 bp | 0.3587342 |
| GABA receptor                                                            | 0.1417 mf | 0.3587342 |
| Structural protein                                                       | 0.144 mf  | 0.3588024 |
| Angiogenesis                                                             | 0.1449 bp | 0.3588024 |
| Natural killer cell mediated immunity                                    | 0.1464 bp | 0.3588024 |
| Endothelin signaling pathway                                             | 0.1474 pw | 0.3588024 |
| Protein ADP-ribosylation                                                 | 0.1476 bp | 0.3588024 |
| Angiotensin II-stimulated signaling through G proteins and beta-arrestin | 0.1478 pw | 0.3588024 |
| mRNA transcription elongation                                            | 0.1487 bp | 0.3588024 |
| Transmembrane receptor regulatory_adaptor protein                        | 0.1491 mf | 0.3588024 |
| Chemokine                                                                | 0.1498 mf | 0.3588024 |
| Anion transport                                                          | 0.1512 bp | 0.36      |
| Other miscellaneous function protein                                     | 0.1541 mf | 0.3647337 |
| Other actin family cytoskeletal protein                                  | 0.157 mf  | 0.3694118 |
| Other membrane traffic protein                                           | 0.159 mf  | 0.3719298 |
| Ion channel                                                              | 0.162 mf  | 0.3767442 |
| Other cell adhesion molecule                                             | 0.1632 mf | 0.377341  |
| Signaling molecule                                                       | 0.1653 mf | 0.3775    |
| Circadian clock system                                                   | 0.17 pw   | 0.3775    |
| Endoderm development                                                     | 0.1702 bp | 0.3775    |
| Tumor necrosis factor family member                                      | 0.1703 mf | 0.3775    |
| Oxytocin receptor mediated signaling pathway                             | 0.1716 pw | 0.3775    |
| CREB transcription factor                                                | 0.1733 mf | 0.3775    |
| Other metabolism                                                         | 0.1752 bp | 0.3775    |
| Apoptosis signaling pathway                                              | 0.1775 pw | 0.3775    |
| Other signaling molecule                                                 | 0.1778 mf | 0.3775    |
| Transcription regulation by bZIP transcription factor                    | 0.178 pw  | 0.3775    |
| Stress response                                                          | 0.1784 bp | 0.3775    |
| Neuromuscular synaptic transmission                                      | 0.1793 bp | 0.3775    |
| Thyrotropin-releasing hormone receptor signaling pathway                 | 0.1793 pw | 0.3775    |
| Protein complex assembly                                                 | 0.1799 bp | 0.3775    |
| Protein biosynthesis                                                     | 0.1802 bp | 0.3775    |

|                                                           |           |           |
|-----------------------------------------------------------|-----------|-----------|
| T-cell mediated immunity                                  | 0.1804 bp | 0.3775    |
| Lyase                                                     | 0.1808 mf | 0.3775    |
| Microtubule binding motor protein                         | 0.1812 mf | 0.3775    |
| Ligand-mediated signaling                                 | 0.1812 bp | 0.3775    |
| Defense_immunity protein                                  | 0.1824 mf | 0.377641  |
| DNA-directed DNA polymerase                               | 0.1838 mf | 0.377641  |
| Pre-mRNA processing                                       | 0.1841 bp | 0.377641  |
| Transferase                                               | 0.1858 mf | 0.3783838 |
| Vision                                                    | 0.187 bp  | 0.3783838 |
| N-acetylglucosamine metabolism                            | 0.1873 pw | 0.3783838 |
| De novo purine biosynthesis                               | 0.1894 pw | 0.3807035 |
| Tumor necrosis factor receptor                            | 0.1918 mf | 0.3836    |
| 5HT2 type receptor mediated signaling pathway             | 0.193 pw  | 0.3837624 |
| Small GTPase                                              | 0.1938 mf | 0.3837624 |
| Intracellular signaling cascade                           | 0.1979 bp | 0.3899507 |
| Purine metabolism                                         | 0.2009 bp | 0.3939216 |
| JNK cascade                                               | 0.2019 bp | 0.3939512 |
| Glycosidase                                               | 0.2061 mf | 0.3963981 |
| Cytokine and chemokine mediated signaling pathway         | 0.2068 bp | 0.3963981 |
| Synthase and synthetase                                   | 0.2078 mf | 0.3963981 |
| ATP synthesis                                             | 0.2082 pw | 0.3963981 |
| Phenylalanine biosynthesis                                | 0.2086 pw | 0.3963981 |
| Corticotropin releasing factor receptor signaling pathway | 0.2091 pw | 0.3963981 |
| Protein modification                                      | 0.2105 bp | 0.3971698 |
| Regulation of phosphate metabolism                        | 0.2118 bp | 0.3977465 |
| Phosphate transport                                       | 0.2139 bp | 0.3986977 |
| Meiosis                                                   | 0.2143 bp | 0.3986977 |
| Other nucleoside, nucleotide and nucleic acid metabolism  | 0.2171 bp | 0.4012844 |
| Glycosyltransferase                                       | 0.2178 mf | 0.4012844 |
| Glycolysis                                                | 0.2187 bp | 0.4012844 |
| Cation transport                                          | 0.2229 bp | 0.406     |
| Neurotrophic factor                                       | 0.2233 mf | 0.406     |
| Asymmetric protein localization                           | 0.226 bp  | 0.4065517 |
| Annexin                                                   | 0.2276 mf | 0.4065517 |
| Extracellular matrix linker protein                       | 0.2291 mf | 0.4065517 |
| Intracellular protein traffic                             | 0.2297 bp | 0.4065517 |
| Serine protease                                           | 0.2305 mf | 0.4065517 |
| Vitamin biosynthesis                                      | 0.2321 bp | 0.4065517 |
| Other ligase                                              | 0.2327 mf | 0.4065517 |
| Exodeoxyribonuclease                                      | 0.2329 mf | 0.4065517 |
| Endoribonuclease                                          | 0.2339 mf | 0.4065517 |
| G-protein modulator                                       | 0.2347 mf | 0.4065517 |
| Protein targeting                                         | 0.2355 bp | 0.4065517 |
| Chromatin_chromatin-binding protein                       | 0.2358 mf | 0.4065517 |
| Other cytokine                                            | 0.2403 mf | 0.4125322 |
| Ribosomal protein                                         | 0.2414 mf | 0.4126496 |
| Coenzyme A biosynthesis                                   | 0.2444 pw | 0.416     |
| Cation transporter                                        | 0.2467 mf | 0.4168776 |
| Other oncogenesis                                         | 0.247 bp  | 0.4168776 |
| Single-stranded DNA-binding protein                       | 0.2486 mf | 0.4170492 |
| Determination of dorsal_ventral axis                      | 0.2515 bp | 0.4170492 |
| Spermatogenesis and motility                              | 0.2517 bp | 0.4170492 |
| Other isomerase                                           | 0.2522 mf | 0.4170492 |

|                                                                                   |           |           |
|-----------------------------------------------------------------------------------|-----------|-----------|
| Other synthase_synthetase                                                         | 0.2534 mf | 0.4170492 |
| P53 pathway feedback loops 1                                                      | 0.2537 pw | 0.4170492 |
| mRNA end-processing and stability                                                 | 0.2544 bp | 0.4170492 |
| Other developmental process                                                       | 0.2568 bp | 0.4183133 |
| Large G-protein                                                                   | 0.2573 mf | 0.4183133 |
| Carbohydrate transport                                                            | 0.2586 bp | 0.4183133 |
| Tyrosine biosynthesis                                                             | 0.2602 pw | 0.4183133 |
| Cell junction protein                                                             | 0.2604 mf | 0.4183133 |
| Hydrolase                                                                         | 0.2623 mf | 0.4193701 |
| Antibacterial response protein                                                    | 0.2655 mf | 0.4193701 |
| Other apoptosis                                                                   | 0.266 bp  | 0.4193701 |
| Immunoglobulin receptor family member                                             | 0.2662 mf | 0.4193701 |
| Cysteine protease                                                                 | 0.2663 mf | 0.4193701 |
| Skeletal development                                                              | 0.2687 bp | 0.4214902 |
| Kinase activator                                                                  | 0.273 mf  | 0.4249612 |
| mRNA splicing                                                                     | 0.2735 pw | 0.4249612 |
| Alzheimer disease-amyloid secretase pathway                                       | 0.2741 pw | 0.4249612 |
| Plasminogen activating cascade                                                    | 0.2781 pw | 0.4253992 |
| Methyltransferase                                                                 | 0.2788 mf | 0.4253992 |
| Other carbohydrate metabolism                                                     | 0.279 bp  | 0.4253992 |
| Pyrimidine metabolism                                                             | 0.2793 bp | 0.4253992 |
| Lysine biosynthesis                                                               | 0.2797 pw | 0.4253992 |
| Carbohydrate metabolism                                                           | 0.2819 bp | 0.4271212 |
| Integrin signalling pathway                                                       | 0.285 pw  | 0.4294424 |
| Protein-lipid modification                                                        | 0.2864 bp | 0.4294424 |
| Other phosphatase                                                                 | 0.2877 mf | 0.4294424 |
| B-cell- and antibody-mediated immunity                                            | 0.288 bp  | 0.4294424 |
| Cholesterol biosynthesis                                                          | 0.2888 pw | 0.4294424 |
| DNA recombination                                                                 | 0.2914 bp | 0.4317037 |
| Oncogene                                                                          | 0.2977 bp | 0.4359124 |
| Nucleic acid binding                                                              | 0.2979 mf | 0.4359124 |
| Pyruvate metabolism                                                               | 0.2979 pw | 0.4359124 |
| Other cell junction protein                                                       | 0.2986 mf | 0.4359124 |
| Heterotrimeric G-protein signaling pathway-Gq alpha and Go alpha mediated pathway | 0.3009 pw | 0.4376727 |
| Regulation of carbohydrate metabolism                                             | 0.303 bp  | 0.4377061 |
| Other intracellular protein traffic                                               | 0.3044 bp | 0.4377061 |
| Ribonucleoprotein                                                                 | 0.3052 mf | 0.4377061 |
| Ion transport                                                                     | 0.3053 bp | 0.4377061 |
| Other select calcium binding proteins                                             | 0.3067 mf | 0.4381429 |
| NO mediated signal transduction                                                   | 0.3092 bp | 0.4389189 |
| Immunity and defense                                                              | 0.3113 bp | 0.4389189 |
| DNA degradation                                                                   | 0.3126 bp | 0.4389189 |
| Fertilization                                                                     | 0.3154 bp | 0.4389189 |
| Non-motor actin binding protein                                                   | 0.3157 mf | 0.4389189 |
| Coenzyme and prosthetic group metabolism                                          | 0.3157 bp | 0.4389189 |
| Sulfur metabolism                                                                 | 0.3175 bp | 0.4389189 |
| Allantoin degradation                                                             | 0.3181 pw | 0.4389189 |
| Growth factor                                                                     | 0.3189 mf | 0.4389189 |
| Nucleotidyltransferase                                                            | 0.3191 mf | 0.4389189 |
| Aspartic protease                                                                 | 0.3196 mf | 0.4389189 |
| Synthase                                                                          | 0.322 mf  | 0.4389189 |
| Steroid hormone metabolism                                                        | 0.3226 bp | 0.4389189 |
| Fatty acid beta-oxidation                                                         | 0.323 bp  | 0.4389189 |

|                                                                                |           |           |
|--------------------------------------------------------------------------------|-----------|-----------|
| Regulation of vasoconstriction, dilation                                       | 0.3246 bp | 0.4389189 |
| Mutase                                                                         | 0.3248 mf | 0.4389189 |
| Other steroid metabolism                                                       | 0.3302 bp | 0.4423607 |
| Other pathways of electron transport                                           | 0.3306 bp | 0.4423607 |
| Tyrosine protein kinase receptor                                               | 0.3313 mf | 0.4423607 |
| Cytoskeletal regulation by Rho GTPase                                          | 0.3349 pw | 0.4423607 |
| Protease                                                                       | 0.3355 mf | 0.4423607 |
| mRNA transcription termination                                                 | 0.3356 bp | 0.4423607 |
| Serine_threonine protein kinase receptor                                       | 0.3361 mf | 0.4423607 |
| Axon guidance mediated by semaphorins                                          | 0.3362 pw | 0.4423607 |
| Histamine H2 receptor mediated signaling pathway                               | 0.3373 pw | 0.4423607 |
| Adenine and hypoxanthine salvage pathway                                       | 0.3397 pw | 0.4440523 |
| Interleukin                                                                    | 0.3435 mf | 0.4458786 |
| MAPKKK cascade                                                                 | 0.3447 bp | 0.4458786 |
| Oxidative stress response                                                      | 0.3451 pw | 0.4458786 |
| Miscellaneous                                                                  | 0.3465 bp | 0.4458786 |
| p38 MAPK pathway                                                               | 0.3476 pw | 0.4458786 |
| Other oxidoreductase                                                           | 0.3489 mf | 0.4458786 |
| Amino acid metabolism                                                          | 0.3489 bp | 0.4458786 |
| Protein phosphatase                                                            | 0.3508 mf | 0.446879  |
| DNA-directed RNA polymerase                                                    | 0.3522 mf | 0.4472381 |
| Apoptosis                                                                      | 0.3542 bp | 0.4483544 |
| Protein targeting and localization                                             | 0.3578 bp | 0.4509434 |
| PDGF signaling pathway                                                         | 0.3585 pw | 0.4509434 |
| Interferon                                                                     | 0.3631 mf | 0.4519149 |
| Insulin_IGF pathway-mitogen activated protein kinase kinase_MAP kinase cascade | 0.3656 pw | 0.4519149 |
| DNA methyltransferase                                                          | 0.3657 mf | 0.4519149 |
| Membrane traffic regulatory protein                                            | 0.3664 mf | 0.4519149 |
| CAM family adhesion molecule                                                   | 0.3676 mf | 0.4519149 |
| Acetylcholine receptor                                                         | 0.3687 mf | 0.4519149 |
| Translation elongation factor                                                  | 0.3689 mf | 0.4519149 |
| Immunoglobulin                                                                 | 0.3691 mf | 0.4519149 |
| Protein disulfide-isomerase reaction                                           | 0.3704 bp | 0.4519149 |
| Synaptic_vesicle_trafficking                                                   | 0.3712 pw | 0.4519149 |
| Translational regulation                                                       | 0.3717 bp | 0.4519149 |
| mRNA polyadenylation                                                           | 0.3736 bp | 0.4528485 |
| Apolipoprotein                                                                 | 0.3755 mf | 0.4537764 |
| JAK-STAT cascade                                                               | 0.3792 bp | 0.4551642 |
| Gametogenesis                                                                  | 0.3802 bp | 0.4551642 |
| Voltage-gated ion channel                                                      | 0.3812 mf | 0.4551642 |
| Protein metabolism and modification                                            | 0.3812 bp | 0.4551642 |
| Vasopressin synthesis                                                          | 0.3891 pw | 0.4632143 |
| Phosphodiesterase                                                              | 0.3925 mf | 0.4654335 |
| Gluconeogenesis                                                                | 0.3957 bp | 0.4654335 |
| Synthetase                                                                     | 0.397 mf  | 0.4654335 |
| Constitutive exocytosis                                                        | 0.3975 bp | 0.4654335 |
| mRNA transcription                                                             | 0.3991 bp | 0.4654335 |
| Nucleotide phosphatase                                                         | 0.3994 mf | 0.4654335 |
| Transporter                                                                    | 0.4003 mf | 0.4654335 |
| Galactosidase                                                                  | 0.4008 mf | 0.4654335 |
| Endodeoxyribonuclease                                                          | 0.4023 mf | 0.4654335 |
| Olfaction                                                                      | 0.4026 bp | 0.4654335 |
| Protein kinase                                                                 | 0.4068 mf | 0.4661111 |

|                                                    |           |           |
|----------------------------------------------------|-----------|-----------|
| Muscle development                                 | 0.4086 bp | 0.4661111 |
| TCA cycle                                          | 0.4097 pw | 0.4661111 |
| Adenylate cyclase                                  | 0.4101 mf | 0.4661111 |
| Antioxidation and free radical removal             | 0.4107 bp | 0.4661111 |
| Toll receptor signaling pathway                    | 0.4112 pw | 0.4661111 |
| Interferon-gamma signaling pathway                 | 0.4128 pw | 0.4661111 |
| Non-vertebrate process                             | 0.4151 bp | 0.4661111 |
| Granulocyte-mediated immunity                      | 0.4156 bp | 0.4661111 |
| Other hydrolase                                    | 0.4162 mf | 0.4661111 |
| mRNA polyadenylation factor                        | 0.4184 mf | 0.4661111 |
| Cell proliferation and differentiation             | 0.4194 bp | 0.4661111 |
| Xanthine and guanine salvage pathway               | 0.4194 pw | 0.4661111 |
| Hearing                                            | 0.4195 bp | 0.4661111 |
| Nicotinic acetylcholine receptor signaling pathway | 0.4212 pw | 0.4667036 |
| Hydratase                                          | 0.4228 mf | 0.4671823 |
| Notch signaling pathway                            | 0.4241 pw | 0.4673278 |
| Protein folding                                    | 0.4261 bp | 0.4682418 |
| Other enzyme activator                             | 0.4279 mf | 0.4689315 |
| Valine biosynthesis                                | 0.4322 pw | 0.4723497 |
| Isoleucine biosynthesis                            | 0.4337 pw | 0.4726975 |
| General transcription by RNA polymerase I          | 0.4386 pw | 0.4747781 |
| Acyl-CoA metabolism                                | 0.4399 bp | 0.4747781 |
| Pentose phosphate pathway                          | 0.4399 pw | 0.4747781 |
| MHCI-mediated immunity                             | 0.4411 bp | 0.4747781 |
| Other transporter                                  | 0.4438 mf | 0.4747781 |
| JAK_STAT signaling pathway                         | 0.4441 pw | 0.4747781 |
| Centromere DNA-binding protein                     | 0.4454 mf | 0.4747781 |
| Aldolase                                           | 0.4461 mf | 0.4747781 |
| Kinase modulator                                   | 0.4464 mf | 0.4747781 |
| Gamma-aminobutyric acid synthesis                  | 0.4477 pw | 0.4747781 |
| Deacetylase                                        | 0.4505 mf | 0.4747781 |
| Aminoacyl-tRNA synthetase                          | 0.4512 mf | 0.4747781 |
| Lipase                                             | 0.4518 mf | 0.4747781 |
| Esterase                                           | 0.4523 mf | 0.4747781 |
| Other cytoskeletal proteins                        | 0.4536 mf | 0.4747781 |
| Lipoate_biosynthesis                               | 0.4546 pw | 0.4747781 |
| Protein phosphorylation                            | 0.4619 bp | 0.481134  |
| Carbohydrate kinase                                | 0.4646 mf | 0.481134  |
| Other coenzyme and prosthetic group metabolism     | 0.4649 bp | 0.481134  |
| Other protein metabolism                           | 0.4659 bp | 0.481134  |
| Nicotine degradation                               | 0.4667 pw | 0.481134  |
| Homeostasis                                        | 0.4689 bp | 0.481596  |
| Coenzyme metabolism                                | 0.4723 bp | 0.481596  |
| Sensory perception                                 | 0.4724 bp | 0.481596  |
| Interleukin receptor                               | 0.4748 mf | 0.481596  |
| Monosaccharide metabolism                          | 0.4748 bp | 0.481596  |
| Ascorbate degradation                              | 0.4759 pw | 0.481596  |
| Asparagine and aspartate biosynthesis              | 0.4767 pw | 0.481596  |
| Other neuronal activity                            | 0.4783 bp | 0.481596  |
| Reverse transcriptase                              | 0.4801 mf | 0.481596  |
| Mannose metabolism                                 | 0.4804 pw | 0.481596  |
| Oxidoreductase                                     | 0.4816 mf | 0.481596  |
| Helicase                                           | 0.4821 mf | 0.481596  |



|                                                                                |           |           |
|--------------------------------------------------------------------------------|-----------|-----------|
| NF-kappaB cascade                                                              | 0.4828 bp | 0.481596  |
| Thiamine metabolism                                                            | 0.4866 pw | 0.482233  |
| 5-Hydroxytryptamine biosynthesis                                               | 0.4871 pw | 0.482233  |
| Phosphorylase                                                                  | 0.4931 mf | 0.482233  |
| Pterin metabolism                                                              | 0.4932 bp | 0.482233  |
| Metabolism of cyclic nucleotides                                               | 0.494 bp  | 0.482233  |
| Interleukin signaling pathway                                                  | 0.494 pw  | 0.482233  |
| Cell cycle                                                                     | 0.4954 pw | 0.482233  |
| Transaminase                                                                   | 0.4956 mf | 0.482233  |
| Isomerase                                                                      | 0.4958 mf | 0.482233  |
| Endogenous_cannabinoid_signaling                                               | 0.4958 pw | 0.482233  |
| Ras Pathway                                                                    | 0.4967 pw | 0.482233  |
| Other intracellular signaling cascade                                          | 0.4983 bp | 0.482615  |
| Peroxisome transport                                                           | 0.5027 bp | 0.4842206 |
| Salvage pyrimidine deoxyribonucleotides                                        | 0.5037 pw | 0.4842206 |
| Other microtubule family cytoskeletal protein                                  | 0.5044 mf | 0.4842206 |
| Other zinc finger transcription factor                                         | 0.5048 mf | 0.4842206 |
| Fatty acid biosynthesis                                                        | 0.5078 bp | 0.485933  |
| Neurotransmitter release                                                       | 0.5116 bp | 0.488401  |
| Select regulatory molecule                                                     | 0.5146 mf | 0.4900952 |
| Nucleoside, nucleotide and nucleic acid transport                              | 0.5242 bp | 0.4975059 |
| Intermediate filament binding protein                                          | 0.5253 mf | 0.4975059 |
| Cytoskeletal protein                                                           | 0.5274 mf | 0.4975059 |
| Heterotrimeric G-protein signaling pathway-rod outer segment phototransduction | 0.5274 pw | 0.4975059 |
| Surfactant                                                                     | 0.5286 mf | 0.4975059 |
| Decarboxylase                                                                  | 0.5319 mf | 0.4994366 |
| Nuclear transport                                                              | 0.5357 bp | 0.5018267 |
| Pyrophosphatase                                                                | 0.5397 mf | 0.5043925 |
| Other ligand-gated ion channel                                                 | 0.5421 mf | 0.5054545 |
| Intermediate filament                                                          | 0.5454 mf | 0.5070998 |
| Gut mesoderm development                                                       | 0.5464 bp | 0.5070998 |
| Methylmalonyl pathway                                                          | 0.5548 pw | 0.5134562 |
| Anion channel                                                                  | 0.5561 mf | 0.5134562 |
| Kinase                                                                         | 0.5571 mf | 0.5134562 |
| Hsp 90 family chaperone                                                        | 0.5596 mf | 0.5140367 |
| Chemosensory perception                                                        | 0.5603 bp | 0.5140367 |
| Disaccharide metabolism                                                        | 0.5616 bp | 0.5140503 |
| Pentose-phosphate shunt                                                        | 0.5643 bp | 0.5153425 |
| Pyridoxal phosphate salvage pathway                                            | 0.5671 pw | 0.5167198 |
| Cytokine                                                                       | 0.5697 mf | 0.5173696 |
| Cell cycle control                                                             | 0.5704 bp | 0.5173696 |
| Voltage-gated sodium channel                                                   | 0.5764 mf | 0.521629  |
| Nuclear hormone receptor                                                       | 0.5779 mf | 0.5218059 |
| Double-stranded DNA binding protein                                            | 0.5819 mf | 0.5242342 |
| Oxidative phosphorylation                                                      | 0.5834 bp | 0.5243946 |
| Epimerase_racemase                                                             | 0.5847 mf | 0.5243946 |
| DNA ligase                                                                     | 0.5869 mf | 0.5244444 |
| Acyltransferase                                                                | 0.5893 mf | 0.5244444 |
| tRNA metabolism                                                                | 0.5898 bp | 0.5244444 |
| Transketolase                                                                  | 0.59 mf   | 0.5244444 |
| Other enzyme inhibitor                                                         | 0.5916 mf | 0.5247007 |
| Pain sensation                                                                 | 0.6062 bp | 0.5364602 |
| Guanyl-nucleotide exchange factor                                              | 0.6087 mf | 0.5374834 |

|                                                                                   |           |           |
|-----------------------------------------------------------------------------------|-----------|-----------|
| Interferon-mediated immunity                                                      | 0.6132 bp | 0.538421  |
| MHCII-mediated immunity                                                           | 0.6136 bp | 0.538421  |
| Heart development                                                                 | 0.6138 bp | 0.538421  |
| Hematopoiesis                                                                     | 0.6186 bp | 0.540524  |
| Formyltetrahydroformate biosynthesis                                              | 0.6189 pw | 0.540524  |
| Other sensory perception                                                          | 0.6219 bp | 0.5419608 |
| Blood clotting                                                                    | 0.6256 bp | 0.54329   |
| GABA-B_receptor_II_signaling                                                      | 0.6269 pw | 0.54329   |
| Enkephalin release                                                                | 0.6275 pw | 0.54329   |
| SNARE protein                                                                     | 0.6289 mf | 0.5433261 |
| Lipid metabolism                                                                  | 0.6363 bp | 0.5484979 |
| Heterotrimeric G-protein signaling pathway-Gi alpha and Gs alpha mediated pathway | 0.6384 pw | 0.5484979 |
| Ligase                                                                            | 0.639 mf  | 0.5484979 |
| RNA helicase                                                                      | 0.6411 mf | 0.5491221 |
| Neuropeptide                                                                      | 0.6437 mf | 0.5501709 |
| Axon guidance mediated by netrin                                                  | 0.647 pw  | 0.5518124 |
| Blood coagulation                                                                 | 0.651 pw  | 0.5532203 |
| Transcription cofactor                                                            | 0.6528 mf | 0.5532203 |
| Mitosis                                                                           | 0.6528 bp | 0.5532203 |
| Major histocompatibility complex antigen                                          | 0.6551 mf | 0.5539958 |
| Cyclic nucleotide-gated ion channel                                               | 0.658 mf  | 0.5552743 |
| Non-motor microtubule binding protein                                             | 0.6617 mf | 0.5568067 |
| Metalloprotease inhibitor                                                         | 0.6626 mf | 0.5568067 |
| Translation release factor                                                        | 0.6673 mf | 0.5578333 |
| Vitamin B6 metabolism                                                             | 0.6684 pw | 0.5578333 |
| Other cell cycle process                                                          | 0.6692 bp | 0.5578333 |
| Axon guidance mediated by Slit_Robo                                               | 0.6694 pw | 0.5578333 |
| Ubiquitin proteasome pathway                                                      | 0.6758 pw | 0.560911  |
| Hsp 70 family chaperone                                                           | 0.6767 mf | 0.560911  |
| Protein methylation                                                               | 0.6773 bp | 0.560911  |
| Lactation, mammary development                                                    | 0.6853 bp | 0.5655258 |
| Other proteases                                                                   | 0.6857 mf | 0.5655258 |
| Reverse transcription                                                             | 0.6901 bp | 0.5674743 |
| Detoxification                                                                    | 0.6909 bp | 0.5674743 |
| Dehydrogenase                                                                     | 0.6942 mf | 0.5678528 |
| Muscarinic acetylcholine receptor 2 and 4 signaling pathway                       | 0.6942 pw | 0.5678528 |
| Arginine biosynthesis                                                             | 0.6981 pw | 0.5694165 |
| Gap junction                                                                      | 0.7007 mf | 0.5694165 |
| Blood circulation and gas exchange                                                | 0.702 bp  | 0.5694165 |
| Other RNA-binding protein                                                         | 0.704 mf  | 0.5694165 |
| Phospholipid metabolism                                                           | 0.7047 bp | 0.5694165 |
| p53 pathway by glucose deprivation                                                | 0.7067 pw | 0.5694165 |
| Synaptic transmission                                                             | 0.7072 bp | 0.5694165 |
| Other cytokine receptor                                                           | 0.7075 mf | 0.5694165 |
| 2-arachidonoylglycerol biosynthesis                                               | 0.709 pw  | 0.5694779 |
| Purine metabolism                                                                 | 0.7118 pw | 0.56968   |
| Deaminase                                                                         | 0.7121 mf | 0.56968   |
| G-protein                                                                         | 0.72 mf   | 0.5748503 |
| Nuclease                                                                          | 0.7229 mf | 0.5757002 |
| Miscellaneous function                                                            | 0.7251 mf | 0.5757002 |
| Mitochondrial transport                                                           | 0.7264 bp | 0.5757002 |
| Histone                                                                           | 0.7273 mf | 0.5757002 |
| Cytokine receptor                                                                 | 0.7286 mf | 0.5757002 |

|                                                        |           |           |
|--------------------------------------------------------|-----------|-----------|
| Acetyltransferase                                      | 0.7297 mf | 0.5757002 |
| Other nucleic acid binding                             | 0.7334 mf | 0.5774803 |
| Ferredoxin metabolism                                  | 0.7366 bp | 0.5776998 |
| Glutamate receptor                                     | 0.7374 mf | 0.5776998 |
| Anterior_posterior patterning                          | 0.7387 bp | 0.5776998 |
| Action potential propagation                           | 0.7402 bp | 0.5776998 |
| Microtubule family cytoskeletal protein                | 0.7409 mf | 0.5776998 |
| Succinate to propionate conversion                     | 0.7457 pw | 0.5790366 |
| Carbohydrate transporter                               | 0.7458 mf | 0.5790366 |
| Complement-mediated immunity                           | 0.7481 bp | 0.5790366 |
| ATP synthase                                           | 0.749 mf  | 0.5790366 |
| Insulin_IGF pathway-protein kinase B signaling cascade | 0.7501 pw | 0.5790366 |
| Glucosidase                                            | 0.7513 mf | 0.5790366 |
| Cell structure and motility                            | 0.756 bp  | 0.5815385 |
| Complement component                                   | 0.7602 mf | 0.5836468 |
| Other protease inhibitor                               | 0.7659 mf | 0.5858779 |
| Heme biosynthesis                                      | 0.7665 pw | 0.5858779 |
| Pheromone response                                     | 0.7675 bp | 0.5858779 |
| mRNA splicing factor                                   | 0.7729 mf | 0.5879087 |
| Chaperone                                              | 0.7731 mf | 0.5879087 |
| Small molecule transport                               | 0.7751 bp | 0.5883112 |
| Other polysaccharide metabolism                        | 0.779 bp  | 0.5901515 |
| Voltage-gated potassium channel                        | 0.7806 mf | 0.5902457 |
| Other mRNA transcription                               | 0.7825 bp | 0.590566  |
| Translation initiation factor                          | 0.785 mf  | 0.5913371 |
| Folate biosynthesis                                    | 0.7914 pw | 0.5942222 |
| Carbohydrate phosphatase                               | 0.7937 mf | 0.5942222 |
| Metalloprotease                                        | 0.7959 mf | 0.5942222 |
| mRNA transcription initiation                          | 0.7964 bp | 0.5942222 |
| Other extracellular matrix                             | 0.7968 mf | 0.5942222 |
| mRNA capping                                           | 0.7986 bp | 0.5942222 |
| Mesoderm development                                   | 0.8007 bp | 0.5942222 |
| Glutamine glutamate conversion                         | 0.801 pw  | 0.5942222 |
| Other G-protein modulator                              | 0.8022 mf | 0.5942222 |
| Ionotropic glutamate receptor pathway                  | 0.8056 pw | 0.5956377 |
| Pinocytosis                                            | 0.8092 bp | 0.5971956 |
| Dopamine receptor mediated signaling pathway           | 0.8124 pw | 0.598453  |
| Adrenaline and noradrenaline biosynthesis              | 0.8212 pw | 0.6032117 |
| Sulfur redox metabolism                                | 0.8232 bp | 0.6032117 |
| RNA catabolism                                         | 0.8234 bp | 0.6032117 |
| Segment specification                                  | 0.8256 bp | 0.6032117 |
| 5HT1 type receptor mediated signaling pathway          | 0.8264 pw | 0.6032117 |
| Vitamin D metabolism and pathway                       | 0.829 pw  | 0.6040073 |
| ATP-binding cassette ABC transporter                   | 0.8341 mf | 0.6066182 |
| O-antigen biosynthesis                                 | 0.8401 pw | 0.608913  |
| Opioid prodynorphin pathway                            | 0.8403 pw | 0.608913  |
| DNA photolyase                                         | 0.8517 mf | 0.6160579 |
| Other transport                                        | 0.855 bp  | 0.6171532 |
| Reductase                                              | 0.8563 mf | 0.6171532 |
| Polyphosphate biosynthesis                             | 0.8606 bp | 0.6179211 |
| Other chaperones                                       | 0.8618 mf | 0.6179211 |
| Ubiquitin-protein ligase                               | 0.862 mf  | 0.6179211 |
| TGF-beta receptor                                      | 0.8636 mf | 0.6179606 |

|                                                   |           |           |
|---------------------------------------------------|-----------|-----------|
| Replication origin binding protein                | 0.8697 mf | 0.6211765 |
| Glycolysis                                        | 0.8712 pw | 0.6211765 |
| 5HT4 type receptor mediated signaling pathway     | 0.8752 pw | 0.6216312 |
| KRAB box transcription factor                     | 0.8754 mf | 0.6216312 |
| Voltage-gated calcium channel                     | 0.8765 mf | 0.6216312 |
| Exoribonuclease                                   | 0.8787 mf | 0.6220885 |
| Other signal transduction                         | 0.8826 bp | 0.6229982 |
| Amino acid metabolism regulation                  | 0.8831 bp | 0.6229982 |
| Amino acid activation                             | 0.8889 bp | 0.6252921 |
| Nucleotide kinase                                 | 0.8899 mf | 0.6252921 |
| Beta3 adrenergic receptor signaling pathway       | 0.8931 pw | 0.6252921 |
| Beta1 adrenergic receptor signaling pathway       | 0.8934 pw | 0.6252921 |
| Other ion channel                                 | 0.895 mf  | 0.6252921 |
| Phosphatase                                       | 0.8999 mf | 0.6252921 |
| Fructose galactose metabolism                     | 0.9004 pw | 0.6252921 |
| Porphyrin metabolism                              | 0.9019 bp | 0.6252921 |
| Salvage pyrimidine ribonucleotides                | 0.9057 pw | 0.6252921 |
| Alanine biosynthesis                              | 0.9064 pw | 0.6252921 |
| Leucine biosynthesis                              | 0.9076 pw | 0.6252921 |
| Basal transcription factor                        | 0.908 mf  | 0.6252921 |
| Nitrogen metabolism                               | 0.909 bp  | 0.6252921 |
| Mitochondrial carrier protein                     | 0.9092 mf | 0.6252921 |
| Beta2 adrenergic receptor signaling pathway       | 0.9098 pw | 0.6252921 |
| Tumor suppressor                                  | 0.9114 bp | 0.6253173 |
| Oxidase                                           | 0.913 mf  | 0.6253425 |
| Other transcription factor                        | 0.9148 mf | 0.6255043 |
| Other kinase                                      | 0.9179 mf | 0.6265529 |
| DNA metabolism                                    | 0.9222 bp | 0.6280952 |
| Homeobox transcription factor                     | 0.9233 mf | 0.6280952 |
| Non-receptor tyrosine protein kinase              | 0.925 mf  | 0.6281834 |
| General transcription regulation                  | 0.9318 pw | 0.6317288 |
| RNA methyltransferase                             | 0.9379 mf | 0.6347885 |
| Fatty acid desaturation                           | 0.9406 bp | 0.6355405 |
| General mRNA transcription activities             | 0.943 bp  | 0.6360877 |
| Non-receptor serine_threonine protein kinase      | 0.9485 mf | 0.6387205 |
| RNA localization                                  | 0.9501 bp | 0.6387227 |
| 5HT3 type receptor mediated signaling pathway     | 0.9521 pw | 0.6389933 |
| Sex determination                                 | 0.9541 bp | 0.639263  |
| rRNA metabolism                                   | 0.9604 bp | 0.642408  |
| Cyclase                                           | 0.9667 mf | 0.6455426 |
| Metabotropic glutamate receptor group III pathway | 0.9792 pw | 0.6500984 |
| Glycogen metabolism                               | 0.9809 bp | 0.6500984 |
| Opioid proopiomelanocortin pathway                | 0.9823 pw | 0.6500984 |
| Glucose homeostasis                               | 0.9824 bp | 0.6500984 |
| Metabotropic glutamate receptor group II pathway  | 0.9836 pw | 0.6500984 |
| Amylase                                           | 0.9845 mf | 0.6500984 |
| Opioid proenkephalin pathway                      | 0.987 pw  | 0.6500984 |
| Kinase inhibitor                                  | 0.9877 mf | 0.6500984 |
| Other enzyme regulator                            | 0.9896 mf | 0.6500984 |
| Serine glycine biosynthesis                       | 0.9911 pw | 0.6500984 |
| Protein acetylation                               | 0.9914 bp | 0.6500984 |
| Taste                                             | 0.9948 bp | 0.6508497 |
| TGF-beta signaling pathway                        | 0.9958 pw | 0.6508497 |

Other DNA-binding protein

0.9975 mf

0.6508972

### 3. Broad functional categories of E2F target-cohorts

#### LEGEND:

**col1-** gene group

**col 2-** gene group type

**col 3-** metric(s)

**col 4-** broad category

| col 1                                                         | col 2 | col 3     | col 4                       |
|---------------------------------------------------------------|-------|-----------|-----------------------------|
| Calcium mediated signaling                                    | bp    | de,dp,cov | Signaling related           |
| G-protein mediated signaling                                  | bp    | de,dp,cov | Signaling related           |
| Steroid hormone-mediated signaling                            | bp    | de,dp,cov | Signaling related           |
| Cell adhesion-mediated signaling                              | bp    | de,dp     | Signaling related           |
| JNK cascade                                                   | bp    | de,cov    | Signaling related           |
| MAPKKK cascade                                                | bp    | de,cov    | Signaling related           |
| Receptor protein tyrosine kinase signaling pathway            | bp    | de        | Signaling related           |
| Cell communication                                            | bp    | cov       | Signaling related           |
| Extracellular matrix protein-mediated signaling               | bp    | cov       | Signaling related           |
| Intracellular signaling cascade                               | bp    | cov       | Signaling related           |
| Signal transduction                                           | bp    | dp        | Signaling related           |
| EGF receptor signaling pathway                                | pw    | de,dp,cov | Signaling related           |
| FAS signaling pathway                                         | pw    | de,dp,cov | Signaling related           |
| FGF signaling pathway                                         | pw    | de,dp,cov | Signaling related           |
| Hedgehog signaling pathway                                    | pw    | de,dp,cov | Signaling related           |
| Wnt signaling pathway                                         | pw    | de,dp,cov | Signaling related           |
| PI3 kinase pathway                                            | pw    | dp,cov    | Signaling related           |
| Oxytocin receptor mediated signaling pathway                  | pw    | de,cov    | Signaling related           |
| p38 MAPK pathway                                              | pw    | de,cov    | Signaling related           |
| Insulin_IGF pathway-mitogen activated protein kinase kinase_1 | pw    | cov       | Signaling related           |
| Alpha adrenergic receptor signaling pathway                   | pw    | de,dp     | Signaling related           |
| Cadherin signaling pathway                                    | pw    | de,dp     | Signaling related           |
| Histamine H1 receptor mediated signaling pathway              | pw    | de,dp     | Signaling related           |
| Metabotropic glutamate receptor group I pathway               | pw    | de,dp     | Signaling related           |
| VEGF signaling pathway                                        | pw    | de,dp     | Signaling related           |
| G-protein coupled receptor                                    | mf    | de,dp,cov | Signaling related           |
| Other carbon metabolism                                       | bp    | de,dp,cov | Energy and other metabolism |
| Regulation of phosphate metabolism                            | bp    | de        | Energy and other metabolism |
| Oxidative phosphorylation                                     | bp    | cov       | Energy and other metabolism |
| Phosphate metabolism                                          | bp    | de,dp     | Energy and other metabolism |
| Tricarboxylic acid pathway                                    | bp    | de,cov    | Energy and other metabolism |
| Vitamin metabolism                                            | bp    | de,dp,cov | Energy and other metabolism |
| Carnitine and CoA metabolism                                  | pw    | de,dp     | Energy and other metabolism |
| Carnitine metabolism                                          | pw    | de,dp     | Energy and other metabolism |
| Methylcitrate cycle                                           | pw    | de,dp     | Energy and other metabolism |
| Ascorbate degradation                                         | pw    | de,cov    | Energy and other metabolism |
| Pyruvate metabolism                                           | pw    | de,cov    | Energy and other metabolism |
| 5-Hydroxytryptamine degradation                               | pw    | dp,cov    | Energy and other metabolism |
| Phenylethylamine degradation                                  | pw    | dp,cov    | Energy and other metabolism |
| ATP synthesis                                                 | pw    | de        | Energy and other metabolism |
| Acetate utilization                                           | pw    | de        | Energy and other metabolism |
| Aminobutyrate degradation                                     | pw    | de,dp,cov | Energy and other metabolism |
| Electron transport                                            | bp    | de,dp,cov | Energy and other metabolism |
| Dehydratase                                                   | mf    | de,dp,cov | Energy and other metabolism |
| Hydroxylase                                                   | mf    | de,dp,cov | Energy and other metabolism |
| Oxygenase                                                     | mf    | de,dp,cov | Energy and other metabolism |
| Peroxidase                                                    | mf    | de,dp,cov | Energy and other metabolism |
| Other transferase                                             | mf    | de,dp,cov | Energy and other metabolism |

|                                                                |           |           |                             |
|----------------------------------------------------------------|-----------|-----------|-----------------------------|
| Guanylate cyclase                                              | <i>mf</i> | de,dp,cov | Energy and other metabolism |
| Other lyase                                                    | <i>mf</i> | de,dp     | Energy and other metabolism |
| Hydrogen transporter                                           | <i>mf</i> | dp,cov    | Energy and other metabolism |
| Phospholipase                                                  | <i>mf</i> | de        | Energy and other metabolism |
| Cell cycle                                                     | <i>bp</i> | cov       | Cell cycle related          |
| Other cell cycle process                                       | <i>bp</i> | cov       | Cell cycle related          |
| Cytokinesis                                                    | <i>bp</i> | de,dp     | Cell cycle related          |
| DNA replication                                                | <i>bp</i> | dp,cov    | Cell cycle related          |
| DNA repair                                                     | <i>bp</i> | dp        | Cell cycle related          |
| Cell structure                                                 | <i>bp</i> | de,dp,cov | Cell cycle related          |
| De novo pyrimidine deoxyribonucleotide biosynthesis            | <i>pw</i> | de        | Cell cycle related          |
| DNA replication                                                | <i>pw</i> | de,dp,cov | Cell cycle related          |
| De novo pyrimidine ribonucleotides biosynthesis                | <i>pw</i> | de,cov    | Cell cycle related          |
| Damaged DNA-binding protein                                    | <i>mf</i> | dp,cov    | Cell cycle related          |
| DNA glycosylase                                                | <i>mf</i> | cov       | Cell cycle related          |
| DNA helicase                                                   | <i>mf</i> | de,dp,cov | Cell cycle related          |
| DNA topoisomerase                                              | <i>mf</i> | de,dp,cov | Cell cycle related          |
| Actin binding cytoskeletal protein                             | <i>mf</i> | de        | Cell cycle related          |
| Actin binding motor protein                                    | <i>mf</i> | de,dp     | Cell cycle related          |
| Actin and actin related protein                                | <i>mf</i> | de,dp,cov | Cell cycle related          |
| Tubulin                                                        | <i>mf</i> | de,dp,cov | Cell cycle related          |
| Primase                                                        | <i>mf</i> | de,dp,cov | Cell cycle related          |
| Protein glycosylation                                          | <i>bp</i> | dp,cov    | Others                      |
| mRNA splicing                                                  | <i>bp</i> | dp,cov    | Others                      |
| Muscle contraction                                             | <i>bp</i> | de,dp,cov | Others                      |
| Neuronal activities                                            | <i>bp</i> | de,dp,cov | Others                      |
| Other protein targeting and localization                       | <i>bp</i> | de,dp,cov | Others                      |
| Growth factor homeostasis                                      | <i>bp</i> | de,dp     | Others                      |
| Proteolysis                                                    | <i>bp</i> | de,dp     | Others                      |
| Vision                                                         | <i>bp</i> | de        | Others                      |
| Hearing                                                        | <i>bp</i> | cov       | Others                      |
| Other homeostasis activities                                   | <i>bp</i> | cov       | Others                      |
| Protein modification                                           | <i>bp</i> | cov       | Others                      |
| Parkinson disease                                              | <i>pw</i> | dp,cov    | Others                      |
| Oxidative stress response                                      | <i>pw</i> | de,cov    | Others                      |
| Hypoxia response via HIF activation                            | <i>pw</i> | de        | Others                      |
| Axon guidance mediated by Slit_Robo                            | <i>pw</i> | cov       | Others                      |
| Axon guidance mediated by netrin                               | <i>pw</i> | cov       | Others                      |
| Other immune and defense                                       | <i>bp</i> | de,dp     | Others                      |
| Macrophage-mediated immunity                                   | <i>bp</i> | cov       | Others                      |
| Cytokine_chemokine mediated immunity                           | <i>bp</i> | dp,cov    | Others                      |
| Phagocytosis                                                   | <i>bp</i> | dp,cov    | Others                      |
| B cell activation                                              | <i>pw</i> | de,dp,cov | Others                      |
| Inflammation mediated by chemokine and cytokine signaling p:pw |           | de,dp,cov | Others                      |
| T cell activation                                              | <i>pw</i> | de,dp,cov | Others                      |
| Basic helix-loop-helix transcription factor                    | <i>mf</i> | de,dp,cov | Others                      |
| Chaperonin                                                     | <i>mf</i> | de,dp,cov | Others                      |
| Cysteine protease inhibitor                                    | <i>mf</i> | de,dp,cov | Others                      |
| Interferon receptor                                            | <i>mf</i> | de,dp,cov | Others                      |
| Myelin protein                                                 | <i>mf</i> | de,dp,cov | Others                      |
| Other receptor                                                 | <i>mf</i> | de,dp,cov | Others                      |
| Peptide hormone                                                | <i>mf</i> | de,dp,cov | Others                      |
| Protease inhibitor                                             | <i>mf</i> | de,dp,cov | Others                      |
| Receptor                                                       | <i>mf</i> | de,dp,cov | Others                      |
| Storage protein                                                | <i>mf</i> | de,dp,cov | Others                      |
| Tight junction                                                 | <i>mf</i> | de,dp,cov | Others                      |
| Transcription factor                                           | <i>mf</i> | de,dp,cov | Others                      |

|                                                   |    |           |                                       |
|---------------------------------------------------|----|-----------|---------------------------------------|
| Vesicle coat protein                              | mf | de,dp,cov | Others                                |
| Zinc finger transcription factor                  | mf | de,dp,cov | Others                                |
| mRNA processing factor                            | mf | de,dp,cov | Others                                |
| Translation factor                                | mf | de,dp,cov | Others                                |
| Calmodulin related protein                        | mf | cov       | Others                                |
| Other miscellaneous function protein              | mf | de        | Others                                |
| Small GTPase                                      | mf | de        | Others                                |
| Serine protease inhibitor                         | mf | de,dp,cov | Others                                |
| Phosphatase inhibitor                             | mf | de,dp,cov | Others                                |
| Phosphatase modulator                             | mf | de,dp,cov | Others                                |
| Protein phosphatase                               | mf | cov       | Others                                |
| Lipid and fatty acid transport                    | bp | de,dp,cov | Transport related                     |
| Lysosome transport                                | bp | de,dp,cov | Transport related                     |
| Transport                                         | bp | de,dp,cov | Transport related                     |
| Vitamin_cofactor transport                        | bp | de,dp,cov | Transport related                     |
| Amino acid transport                              | bp | de,dp     | Transport related                     |
| Carbohydrate transport                            | bp | cov       | Transport related                     |
| Nucleoside, nucleotide and nucleic acid transport | bp | cov       | Transport related                     |
| General vesicle transport                         | bp | de,dp     | Transport related                     |
| Endocytosis                                       | bp | dp,cov    | Transport related                     |
| Exocytosis                                        | bp | de,dp     | Transport related                     |
| Regulated exocytosis                              | bp | cov       | Transport related                     |
| Other membrane traffic protein                    | mf | cov       | Transport related                     |
| Membrane traffic protein                          | mf | de,dp     | Transport related                     |
| Transfer_carrier protein                          | mf | de,dp,cov | Transport related                     |
| Other transfer_carrier protein                    | mf | de,dp,cov | Transport related                     |
| Amino acid transporter                            | mf | de,dp,cov | Transport related                     |
| Other amino acid metabolism                       | bp | cov       | Protein/lipid/carbohydrate metabolism |
| Other carbohydrate metabolism                     | bp | cov       | Protein/lipid/carbohydrate metabolism |
| Steroid metabolism                                | bp | de,dp,cov | Protein/lipid/carbohydrate metabolism |
| Amino acid biosynthesis                           | bp | de,dp     | Protein/lipid/carbohydrate metabolism |
| Fatty acid metabolism                             | bp | de,dp     | Protein/lipid/carbohydrate metabolism |
| Cholesterol metabolism                            | bp | dp,cov    | Protein/lipid/carbohydrate metabolism |
| Lipid and fatty acid binding                      | bp | de,dp,cov | Protein/lipid/carbohydrate metabolism |
| Cholesterol biosynthesis                          | pw | cov       | Protein/lipid/carbohydrate metabolism |
| Cadherin                                          | mf | de,dp     | Cell adhesion                         |
| Extracellular matrix structural protein           | mf | de,dp     | Cell adhesion                         |
| Extracellular matrix                              | mf | de,dp,cov | Cell adhesion                         |
| Extracellular matrix glycoprotein                 | mf | de,dp,cov | Cell adhesion                         |
| Cell adhesion molecule                            | mf | de,dp,cov | Cell adhesion                         |
| Cell adhesion                                     | bp | de,dp,cov | Cell adhesion                         |
| Ectoderm development                              | bp | de,dp,cov | Development related                   |
| Embryogenesis                                     | bp | de,dp,cov | Development related                   |
| Neurogenesis                                      | bp | de,dp,cov | Development related                   |
| Muscle development                                | bp | cov       | Development related                   |
| Developmental processes                           | bp | dp        | Development related                   |
| Oogenesis                                         | bp | de,dp,cov | Development related                   |
| Chromatin packaging and remodeling                | bp | de,dp     | Development related                   |
| HMG box transcription factor                      | mf | de,dp     | Development related                   |
| Angiogenesis                                      | bp | de        | Oncogene related                      |
| Apoptotic processes                               | bp | de,dp     | Oncogene related                      |
| Induction of apoptosis                            | bp | de,dp     | Oncogene related                      |
| Oncogene                                          | bp | cov       | Oncogene related                      |
| Cell motility                                     | bp | de,dp     | Oncogene related                      |
| p53 pathway                                       | pw | dp,cov    | Oncogene related                      |
| Angiogenesis                                      | pw | de,dp     | Oncogene related                      |
| p53 pathway feedback loops 2                      | pw | cov       | Oncogene related                      |
